# Supplementary material
Source: PubMed Central journal article supplement (PMC4409581)
Supplement: supp_WNL.0000000000001487_Appendix_e-3.pdf [file supp_WNL.0000000000001487_Appendix_e-3.pdf]

**Appendix e-3: Complete search strategy*****Medline***

While the staff of HealthSearch makes every effort to ensure that the information gathered is accurate and up-to-date, HealthSearch disclaims any warranties regarding the accuracy or completeness of the information or its fitness for a particular purpose. HealthSearch provides information from public sources both in electronic and print formats and does not guarantee its accuracy, completeness or reliability. The information provided is only for the use of the Client and no liability is accepted by HealthSearch to third parties

Database: Ovid MEDLINE(R) <1950 to May Week 4 2009> Search Strategy:

- 
- 1 (initial adj4 seizure\$).mp. (600)
  - 2 (first adj4 seizure\*).mp. (1892)
  - 3 (new adj4 onset adj4 seizure\$).mp. (313)
  - 4 (de novo adj4 seizure\$).mp. (19)
  - 5 (newly adj4 diagnosed adj4 seizure\$).mp. (101)
  - 6 (primary adj2 seizure\$).mp. (171)
  - 7 (first adj2 onset adj2 seizure\$).mp. (17)
  - 8 (first adj2 episode adj2 seizure\$).mp. (18)
  - 9 (early adj2 seizure\$).mp. (633)
  - 10 or/1-8,9 (3467)
  - 11 exp Anticonvulsants/ (102910)
  - 12 (antiepileptic\$ or anticonvulsant\$).mp. (42295)
  - 13 (acetazolamide or bromides or carbamazepine or chlormethiazole or clonazepam or chlorazepate dipotassium).mp. (25823)
  - 14 (diazepam or dimethadione or estazolam or ethosuximide or flunarizine or lorazepam).mp. (26649)
  - 15 (magnesium sulfate or medazepam or mephentoin or mephobarbital).mp. (5775)
  - 16 (thiopental or tiletamine or trimethadione or valproic acid or vigabatrin).mp. (18693)
  - 17 (dt or tu or th).fs. (2661836)
  - 18 drug therapy/ or exp drug therapy, combination/ or medication errors/ or polypharmacy/ (234231)
  - 19 (drug therap\$ or medication\$ or drug treatment\$ or drug intervention\$).mp. (306878)
  - 20 or/11-19 (2832378)
  - 21 and/10,20 (1559)
  - 22 limit 21 to (english language and humans and yr="1966 -Current" and ("adult (19 to 44 years)" or "middle age (45 to 64 years)" or "all aged (65 and over)" or "aged (80 and over)")) (577)
  - 23 limit 22 to (comment or congresses or editorial or guideline or letter or meta analysis or practice guideline or "review") (88)
  - 24 22 not 23 (489)

25 from 24 keep 1-489 (489)

Database: Ovid MEDLINE(R) <1950 to May Week 5 2009> Search Strategy:

-----

- 1 (initial adj4 seizure\$).mp. (612)
- 2 (first adj4 seizure\*).mp. (1927)
- 3 (new adj4 onset adj4 seizure\$).mp. (313)
- 4 (de novo adj4 seizure\$).mp. (19)
- 5 (newly adj4 diagnosed adj4 seizure\$).mp. (102)
- 6 (primary adj2 seizure\$).mp. (172)
- 7 (first adj2 onset adj2 seizure\$).mp. (17)
- 8 (first adj2 episode adj2 seizure\$).mp. (19)
- 9 (early adj2 seizure\$).mp. (640)
- 10 or/1-9 (3520)
- 11 Patient Satisfaction/ (40103)
- 12 Consumer Satisfaction/ (14939)
- 13 limit 12 to yr="1966 - 1991" (7643)
- 14 (patient adj2 prefer\$).mp. (3259)
- 15 Patient Education as Topic/ (55369)
- 16 counseling/ or directive counseling/ (22876)
- 17 (patient adj2 educat\$).mp. (62267)
- 18 counsel\$.mp. (64572)
- 19 Automobile Driving/ (10106)
- 20 Safety/ (26917)
- 21 or/11,13-20 (203663)
- 22 and/10,21 (71)
- 23 limit 22 to (english language and humans and yr="1966 -Current" and ("adult (19 to 44 years)" or "middle age (45 to 64 years)" or "all aged (65 and over)" or "aged (80 and over)")) (23)
- 24 limit 23 to (comment or congresses or consensus development conference or consensus development conference, nih or editorial or guideline or letter or meta analysis or practice guideline or "review") (4)
- 25 23 not 24 (19)
- 26 (initial adj4 seizure\$).mp. (612)
- 27 (first adj4 seizure\*).mp. (1927)
- 28 (new adj4 onset adj4 seizure\$).mp. (313)
- 29 (de novo adj4 seizure\$).mp. (19)
- 30 (newly adj4 diagnosed adj4 seizure\$).mp. (102)
- 31 (primary adj2 seizure\$).mp. (172)
- 32 (first adj2 onset adj2 seizure\$).mp. (17)
- 33 (first adj2 episode adj2 seizure\$).mp. (19)
- 34 (early adj2 seizure\$).mp. (640)
- 35 or/26-34 (3520)
- 36 exp Anticonvulsants/ (103548)
- 37 (antiepileptic\$ or anticonvulsant\$).mp. (42866)
- 38 (acetazolamide or bromides or carbamazepine or chlormethiazole or clonazepam or chlorazepate dipotassium).mp. (26005)

- 39 (diazepam or dimethadione or estazolam or ethosuximide or flunarizine or lorazepam).mp. (26729)
- 40 (magnesium sulfate or medazepam or mephentyoin or mephobarbital).mp. (5801)
- 41 (thiopental or tiletamine or trimethadione or valproic acid or vigabatrin).mp. (18811)
- 42 (dt or tu or th).fs. (2674412)
- 43 drug therapy/ or exp drug therapy, combination/ or medication errors/ or polypharmacy/ (235351)
- 44 (drug therap\$ or medication\$ or drug treatment\$ or drug intervention\$).mp. (308253)
- 45 or/36-44 (2845497)
- 46 and/35,45 (1586)
- 47 limit 46 to (english language and humans and yr="1966 -Current" and ("adult (19 to 44 years)" or "middle age (45 to 64 years)" or "all aged (65 and over)" or "aged (80 and over)")) (578)
- 48 limit 47 to (comment or congresses or editorial or guideline or letter or meta analysis or practice guideline or "review") (88)
- 49 47 not 48 (490)
- 50 25 not 49 (13)
- 51 find similar to Epilepsy and driving: a survey of automobile accidents attributed to seizure. (69)
- 52 from 51 keep 1,4-6,9-12,15,18,21,28-31,33,35,41-42,46,48-49,52,54,56,60-63,65,67 (31)
- 53 find similar to Should patients with psychogenic nonepileptic seizures be allowed to drive?. (91)
- 54 from 53 keep 2,4,8,13-14,20,23,59,65,67,71,76,79,83,85 (15)
- 55 or/50,52,54 (52)

Database: Ovid MEDLINE(R) <1950 to May Week 5 2009> Search Strategy:

- 
- 1 (initial adj4 seizure\$.mp. (612)
  - 2 (first adj4 seizure\*).mp. (1927)
  - 3 (new adj4 onset adj4 seizure\$.mp. (313)
  - 4 (de novo adj4 seizure\$.mp. (19)
  - 5 (newly adj4 diagnosed adj4 seizure\$.mp. (102)
  - 6 (primary adj2 seizure\$.mp. (172)
  - 7 (first adj2 onset adj2 seizure\$.mp. (17)
  - 8 (first adj2 episode adj2 seizure\$.mp. (19)
  - 9 (early adj2 seizure\$.mp. (640)
  - 10 or/1-9 (3520)
  - 11 prognosis/ or disease-free survival/ or medical futility/ or nomograms/ or exp treatment outcome/ (653808)
  - 12 risk factors/ (382133)
  - 13 Risk Assessment/ (103564)
  - 14 risk/ (79638)
  - 15 limit 14 to yr="1975 - 1987" (46802)
  - 16 risk reduction behavior/ (2880)
  - 17 health behavior/ (20610)
  - 18 limit 17 to yr="1995 - 2002" (6436)
  - 19 (prognos\$ or risk\$.mp. (1350249)
  - 20 or/11-13,15-16,18-19 (1655902)
  - 21 Recurrence/ (128392)
  - 22 recurr\$.mp. (362779)
  - 23 or/21-22 (362779)
  - 24 and/10,20,23 (381)
  - 25 and/10-11 (626)
  - 26 10 and (12 or 13 or 15 or 16 or 18 or 19) (1049)
  - 27 and/10,23 (636)
  - 28 or/24-27 (1513)
  - 29 limit 28 to (english language and yr="1966 -Current" and ("adult (19 to 44 years)" or "middle age (45 to 64 years)" or "all aged (65 and over)" or "aged (80 and over)")) (616)
  - 30 limit 29 to (comment or congresses or consensus development conference or consensus development conference, nih or editorial or guideline or letter or meta analysis or practice guideline or "review") (72)
  - 31 29 not 30 (544)
  - 32 (initial adj4 seizure\$.mp. (612)
  - 33 (first adj4 seizure\*).mp. (1927)
  - 34 (new adj4 onset adj4 seizure\$.mp. (313)
  - 35 (de novo adj4 seizure\$.mp. (19)
  - 36 (newly adj4 diagnosed adj4 seizure\$.mp. (102)
  - 37 (primary adj2 seizure\$.mp. (172)
  - 38 (first adj2 onset adj2 seizure\$.mp. (17)
  - 39 (first adj2 episode adj2 seizure\$.mp. (19)

- 40 (early adj2 seizure\$.mp. (640)
- 41 or/32-40 (3520)
- 42 exp Anticonvulsants/ (103548)
- 43 (antiepileptic\$ or anticonvulsant\$.mp. (42866)
- 44 (acetazolamide or bromides or carbamazepine or chlormethiazole or clonazepam or chlorazepate dipotassium).mp. (26005)
- 45 (diazepam or dimethadione or estazolam or ethosuximide or flunarizine or lorazepam).mp. (26729)
- 46 (magnesium sulfate or medazepam or mephenytoin or mephobarbital).mp. (5801)
- 47 (thiopental or tiletamine or trimethadione or valproic acid or vigabatrin).mp. (18811)
- 48 (dt or tu or th).fs. (2674412)
- 49 drug therapy/ or exp drug therapy, combination/ or medication errors/ or polypharmacy/ (235351)
- 50 (drug therap\$ or medication\$ or drug treatment\$ or drug intervention\$.mp. (308253)
- 51 or/42-50 (2845497)
- 52 and/41,51 (1586)
- 53 limit 52 to (english language and humans and yr="1966 -Current" and ("adult (19 to 44 years)" or "middle age (45 to 64 years)" or "all aged (65 and over)" or "aged (80 and over)")) (578)
- 54 limit 53 to (comment or congresses or editorial or guideline or letter or meta analysis or practice guideline or "review") (88)
- 55 53 not 54 (490)
- 56 31 not 55 (273)

## Ovid MEDLINE(R) 1946 to February Week 4 2013

| #  | Searches                                                                                                                                                                                                                                           | Results | Search Type |
|----|----------------------------------------------------------------------------------------------------------------------------------------------------------------------------------------------------------------------------------------------------|---------|-------------|
| 1  | (onset adj4 seizure?).mp.                                                                                                                                                                                                                          | 5267    | Advanced    |
| 2  | (first adj4 seizure?).mp.                                                                                                                                                                                                                          | 2315    | Advanced    |
| 3  | ((new or newly) adj4 seizure?).mp.                                                                                                                                                                                                                 | 924     | Advanced    |
| 4  | (initial adj4 seizure?).mp.                                                                                                                                                                                                                        | 731     | Advanced    |
| 5  | (early adj4 seizure?).mp.                                                                                                                                                                                                                          | 1509    | Advanced    |
| 6  | (primar* adj4 seizure?).mp.                                                                                                                                                                                                                        | 649     | Advanced    |
| 7  | (de novo adj4 seizure?).mp.                                                                                                                                                                                                                        | 31      | Advanced    |
| 8  | or/1-7                                                                                                                                                                                                                                             | 9585    | Advanced    |
| 9  | Prognosis/                                                                                                                                                                                                                                         | 331904  | Advanced    |
| 10 | exp treatment outcome/                                                                                                                                                                                                                             | 577445  | Advanced    |
| 11 | disease-free survival/                                                                                                                                                                                                                             | 36933   | Advanced    |
| 12 | Medical Futility/                                                                                                                                                                                                                                  | 2191    | Advanced    |
| 13 | nomograms/                                                                                                                                                                                                                                         | 1070    | Advanced    |
| 14 | risk factors/                                                                                                                                                                                                                                      | 508667  | Advanced    |
| 15 | Risk Assessment/                                                                                                                                                                                                                                   | 157019  | Advanced    |
| 16 | risk reduction behavior/                                                                                                                                                                                                                           | 6047    | Advanced    |
| 17 | Recurrence/                                                                                                                                                                                                                                        | 150145  | Advanced    |
| 18 | prognos*.mp.                                                                                                                                                                                                                                       | 495853  | Advanced    |
| 19 | risk*.mp.                                                                                                                                                                                                                                          | 1384361 | Advanced    |
| 20 | recurr*.mp.                                                                                                                                                                                                                                        | 439867  | Advanced    |
| 21 | or/9-20                                                                                                                                                                                                                                            | 2462248 | Advanced    |
| 22 | 8 and 21                                                                                                                                                                                                                                           | 3527    | Advanced    |
| 23 | limit 22 to yr="2009 -Current"                                                                                                                                                                                                                     | 889     | Advanced    |
| 24 | (2009* or 2010* or 2011* or 2012* or 2013*).em.                                                                                                                                                                                                    | 3165213 | Advanced    |
| 25 | 22 and 24                                                                                                                                                                                                                                          | 939     | Advanced    |
| 26 | 23 or 25                                                                                                                                                                                                                                           | 939     | Advanced    |
| 27 | limit 26 to ("all infant (birth to 23 months)" or "all child (0 to 18 years)" or "newborn infant (birth to 1 month)" or "infant (1 to 23 months)" or "preschool child (2 to 5 years)" or "child (6 to 12 years)" or "adolescent (13 to 18 years)") | 517     | Advanced    |

|                                                                                                                                                    |     |          |
|----------------------------------------------------------------------------------------------------------------------------------------------------|-----|----------|
| limit 26 to ("all adult (19 plus years)" or "young adult (19 to 24 years)" or "adult (19 to 44 years)" or "young adult and                         |     |          |
| 28 adult (19-24 and 19-44)" or "middle age (45 to 64 years)" or "middle aged (45 plus years)" or "all aged (65 and over)" or "aged (80 and over)") | 457 | Advanced |
| 29 27 not 28                                                                                                                                       | 276 | Advanced |
| 30 26 not 29                                                                                                                                       | 663 | Advanced |
| 31 limit 30 to english language                                                                                                                    | 622 | Advanced |



## Ovid MEDLINE(R) 1946 to February Week 4 2013

| #  | Searches                           | Results | Search Type |
|----|------------------------------------|---------|-------------|
| 1  | (onset adj4 seizure?).mp.          | 5267    | Advanced    |
| 2  | (first adj4 seizure?).mp.          | 2315    | Advanced    |
| 3  | ((new or newly) adj4 seizure?).mp. | 924     | Advanced    |
| 4  | (initial adj4 seizure?).mp.        | 731     | Advanced    |
| 5  | (early adj4 seizure?).mp.          | 1509    | Advanced    |
| 6  | (primar* adj4 seizure?).mp.        | 649     | Advanced    |
| 7  | (de novo adj4 seizure?).mp.        | 31      | Advanced    |
| 8  | or/1-7                             | 9585    | Advanced    |
| 9  | exp Anticonvulsants/               | 113575  | Advanced    |
| 10 | Acetazolamide/                     | 5648    | Advanced    |
| 11 | Bromides/                          | 4454    | Advanced    |
| 12 | Carbamazepine/                     | 9146    | Advanced    |
| 13 | Chlormethiazole/                   | 752     | Advanced    |
| 14 | Clonazepam/                        | 2218    | Advanced    |
| 15 | Clorazepate Dipotassium/           | 313     | Advanced    |
| 16 | Diazepam/                          | 16601   | Advanced    |
| 17 | Dimethadione/                      | 219     | Advanced    |
| 18 | Estazolam/                         | 85      | Advanced    |
| 19 | Ethosuximide/                      | 846     | Advanced    |
| 20 | Flunarizine/                       | 1126    | Advanced    |
| 21 | Lorazepam/                         | 2487    | Advanced    |
| 22 | Magnesium Sulfate/                 | 4135    | Advanced    |
| 23 | Medazepam/                         | 113     | Advanced    |
| 24 | Mephenytoin/                       | 435     | Advanced    |
| 25 | Mephobarbital/                     | 140     | Advanced    |
| 26 | Thiopental/                        | 5873    | Advanced    |
| 27 | Tiletamine/                        | 250     | Advanced    |
| 28 | Trimethadione/                     | 409     | Advanced    |
| 29 | Valproic Acid/                     | 9576    | Advanced    |

|    |                                                      |        |          |
|----|------------------------------------------------------|--------|----------|
| 30 | Vigabatrin/                                          | 1419   | Advanced |
| 31 | Drug Therapy/                                        | 33137  | Advanced |
| 32 | exp Drug Therapy, Combination/                       | 241609 | Advanced |
| 33 | exp Medication Errors/                               | 10044  | Advanced |
| 34 | polypharmacy/                                        | 2019   | Advanced |
| 35 | antiepileptic*.mp.                                   | 14580  | Advanced |
| 36 | anti-epileptic*.mp.                                  | 1988   | Advanced |
| 37 | anticonvuls*.mp.                                     | 46756  | Advanced |
| 38 | anti-convuls*.mp.                                    | 656    | Advanced |
| 39 | acetazolamide.mp.                                    | 7103   | Advanced |
| 40 | bromides.mp.                                         | 5315   | Advanced |
| 41 | carbamazepine.mp.                                    | 12980  | Advanced |
| 42 | chlormethiazole.mp.                                  | 817    | Advanced |
| 43 | clonazepam.mp.                                       | 3477   | Advanced |
| 44 | clorazepate dipotassium.mp.                          | 331    | Advanced |
| 45 | diazepam.mp.                                         | 22637  | Advanced |
| 46 | dimethadione.mp.                                     | 261    | Advanced |
| 47 | estazolam.mp.                                        | 144    | Advanced |
| 48 | ethosuximide.mp.                                     | 1340   | Advanced |
| 49 | flunarizine.mp.                                      | 1604   | Advanced |
| 50 | lorazepam.mp.                                        | 3551   | Advanced |
| 51 | magnesium sulfate.mp.                                | 4859   | Advanced |
| 52 | medazepam.mp.                                        | 241    | Advanced |
| 53 | mephenytoin.mp.                                      | 1410   | Advanced |
| 54 | mephobarbital.mp.                                    | 178    | Advanced |
| 55 | thiopental.mp.                                       | 7693   | Advanced |
| 56 | tiletamine.mp.                                       | 315    | Advanced |
| 57 | trimethadione.mp.                                    | 541    | Advanced |
| 58 | valproic acid.mp.                                    | 11075  | Advanced |
| 59 | vigabatrin.mp.                                       | 1839   | Advanced |
| 60 | (drug adj2 (therap* or treatment? or interven*)).mp. | 226783 | Advanced |
| 61 | medication*.mp.                                      | 182615 | Advanced |

|    |                                                                                                                                                                                                                                                                            |         |          |
|----|----------------------------------------------------------------------------------------------------------------------------------------------------------------------------------------------------------------------------------------------------------------------------|---------|----------|
| 62 | (dt or tu or th).fs.                                                                                                                                                                                                                                                       | 3184493 | Advanced |
| 63 | or/9-62                                                                                                                                                                                                                                                                    | 3392609 | Advanced |
| 64 | 8 and 63                                                                                                                                                                                                                                                                   | 4019    | Advanced |
| 65 | exp animals/ not (exp animals/ and exp human/)                                                                                                                                                                                                                             | 3778609 | Advanced |
| 66 | 64 not 65                                                                                                                                                                                                                                                                  | 3403    | Advanced |
| 67 | limit 66 to ("all infant (birth to 23 months)" or "all child (0 to 18 years)" or "newborn infant (birth to 1 month)" or "infant (1 to 23 months)" or "preschool child (2 to 5 years)" or "child (6 to 12 years)" or "adolescent (13 to 18 years)")                         | 1938    | Advanced |
| 68 | limit 66 to ("all adult (19 plus years)" or "young adult (19 to 24 years)" or "adult (19 to 44 years)" or "young adult and adult (19-24 and 19-44)" or "middle age (45 to 64 years)" or "middle aged (45 plus years)" or "all aged (65 and over)" or "aged (80 and over)") | 1624    | Advanced |
| 69 | 67 not 68                                                                                                                                                                                                                                                                  | 1104    | Advanced |
| 70 | 66 not 69                                                                                                                                                                                                                                                                  | 2299    | Advanced |
| 71 | limit 70 to english language                                                                                                                                                                                                                                               | 2051    | Advanced |
| 72 | limit 71 to yr="2009 -Current"                                                                                                                                                                                                                                             | 549     | Advanced |
| 73 | (2009* or 2010* or 2011* or 2012* or 2013*).em.                                                                                                                                                                                                                            | 3165213 | Advanced |
| 74 | 71 and 73                                                                                                                                                                                                                                                                  | 588     | Advanced |
| 75 | 72 or 74                                                                                                                                                                                                                                                                   | 588     | Advanced |

## Ovid MEDLINE(R) 1946 to February Week 1 2013

| #  | Searches                                        | Results | Search Type |
|----|-------------------------------------------------|---------|-------------|
| 1  | (onset adj4 seizure?).mp.                       | 5227    | Advanced    |
| 2  | (first adj4 seizure?).mp.                       | 2307    | Advanced    |
| 3  | ((new or newly) adj4 seizure?).mp.              | 921     | Advanced    |
| 4  | (initial adj4 seizure?).mp.                     | 728     | Advanced    |
| 5  | (early adj4 seizure?).mp.                       | 1494    | Advanced    |
| 6  | (primar* adj4 seizure?).mp.                     | 645     | Advanced    |
| 7  | (de novo adj4 seizure?).mp.                     | 31      | Advanced    |
| 8  | or/1-7                                          | 9525    | Advanced    |
| 9  | exp Patient Satisfaction/                       | 54825   | Advanced    |
| 10 | Safety/                                         | 31337   | Advanced    |
| 11 | Patient Safety/                                 | 2095    | Advanced    |
| 12 | Automobile Driving/                             | 12497   | Advanced    |
| 13 | Accidents, Traffic/                             | 32654   | Advanced    |
| 14 | (traffic adj2 safe*).mp.                        | 1040    | Advanced    |
| 15 | driving*.mp.                                    | 41346   | Advanced    |
| 16 | Patient Education as Topic/                     | 66159   | Advanced    |
| 17 | Education/                                      | 17667   | Advanced    |
| 18 | (patient? adj2 educat*).mp.                     | 77928   | Advanced    |
| 19 | Counseling/                                     | 26106   | Advanced    |
| 20 | Directive Counseling/                           | 992     | Advanced    |
| 21 | or/9-20                                         | 267958  | Advanced    |
| 22 | 8 and 21                                        | 120     | Advanced    |
| 23 | (seizure? adj10 driving*).mp.                   | 115     | Advanced    |
| 24 | 22 or 23                                        | 214     | Advanced    |
| 25 | limit 24 to yr="2009 -Current"                  | 52      | Advanced    |
| 26 | (2009* or 2010* or 2011* or 2012* or 2013*).em. | 3081936 | Advanced    |
| 27 | 24 and 26                                       | 57      | Advanced    |
| 28 | 25 or 27                                        | 57      | Advanced    |

Medline\_first\_seizure\_antiepileptics

13

10/03/2014

29 limit 28 to english language

49

Advanced

## Ovid MEDLINE(R) 1946 to March Week 1 2013

| #  | Searches                                        | Results | Search Type |
|----|-------------------------------------------------|---------|-------------|
| 1  | (onset adj4 seizure?).mp.                       | 5282    | Advanced    |
| 2  | (first adj4 seizure?).mp.                       | 2318    | Advanced    |
| 3  | ((new or newly) adj4 seizure?).mp.              | 925     | Advanced    |
| 4  | (initial adj4 seizure?).mp.                     | 731     | Advanced    |
| 5  | (early adj4 seizure?).mp.                       | 1511    | Advanced    |
| 6  | (primar* adj4 seizure?).mp.                     | 652     | Advanced    |
| 7  | (de novo adj4 seizure?).mp.                     | 31      | Advanced    |
| 8  | or/1-7                                          | 9604    | Advanced    |
| 9  | exp Anticonvulsants/                            | 113681  | Advanced    |
| 10 | Drug Therapy/                                   | 33145   | Advanced    |
| 11 | exp Drug Therapy, Combination/                  | 241862  | Advanced    |
| 12 | exp Medication Errors/                          | 10057   | Advanced    |
| 13 | polypharmacy/                                   | 2020    | Advanced    |
| 14 | pharmaceutical care/                            | 3938    | Advanced    |
| 15 | antiepileptic*.mp.                              | 14626   | Advanced    |
| 16 | anti-epileptic*.mp.                             | 1989    | Advanced    |
| 17 | anticonvuls*.mp.                                | 46842   | Advanced    |
| 18 | anti-convuls*.mp.                               | 656     | Advanced    |
| 19 | antiepilepsirine*.mp.                           | 12      | Advanced    |
| 20 | 1 methyl 1,2 diphenylethylamine.mp.             | 6       | Advanced    |
| 21 | 2 isopropylvaleramide.mp.                       | 0       | Advanced    |
| 22 | 2 propyl 2 pentenoic acid.mp.                   | 65      | Advanced    |
| 23 | 2 propyl 4 pentenoic acid.mp.                   | 54      | Advanced    |
| 24 | 4 valproylaminobutyric acid.mp.                 | 0       | Advanced    |
| 25 | 5 benzylidenehydantoin.mp.                      | 2       | Advanced    |
| 26 | 10, 11 dihydro 10,11 dihydroxycarbamazepine.mp. | 10      | Advanced    |
| 27 | carbamazepine 10,11 oxide.mp.                   | 5       | Advanced    |

|    |                             |       |          |
|----|-----------------------------|-------|----------|
| 28 | SC 1001A.mp.                | 7     | Advanced |
| 29 | abecarnil.mp.               | 124   | Advanced |
| 30 | acetazolamide.mp.           | 7105  | Advanced |
| 31 | albutoin.mp.                | 4     | Advanced |
| 32 | allomethadione.mp.          | 0     | Advanced |
| 33 | ameltolide.mp.              | 21    | Advanced |
| 34 | ascorbate magnesium.mp.     | 1     | Advanced |
| 35 | barbexaclone.mp.            | 19    | Advanced |
| 36 | beclamide.mp.               | 19    | Advanced |
| 37 | benzobarbital.mp.           | 60    | Advanced |
| 38 | brivaracetam.mp.            | 47    | Advanced |
| 39 | bromides.mp.                | 5319  | Advanced |
| 40 | brosuximide.mp.             | 0     | Advanced |
| 41 | calcium bromide.mp.         | 23    | Advanced |
| 42 | carabersat.mp.              | 6     | Advanced |
| 43 | caramiphen.mp.              | 65    | Advanced |
| 44 | carbamazepine.mp.           | 12995 | Advanced |
| 45 | cinromide.mp.               | 20    | Advanced |
| 46 | cyheptamide.mp.             | 16    | Advanced |
| 47 | chlormethiazole.mp.         | 817   | Advanced |
| 48 | clonazepam.mp.              | 3477  | Advanced |
| 49 | clorazepate dipotassium.mp. | 331   | Advanced |
| 50 | denzimol.mp.                | 26    | Advanced |
| 51 | dextromethorphan.mp.        | 2093  | Advanced |
| 52 | dezinamide.mp.              | 2     | Advanced |
| 53 | diazepam.mp.                | 22645 | Advanced |
| 54 | doxenitoin.mp.              | 0     | Advanced |
| 55 | dimethadione.mp.            | 261   | Advanced |
| 56 | endixaprine.mp.             | 0     | Advanced |
| 57 | estazolam.mp.               | 144   | Advanced |
| 58 | etazepine.mp.               | 1     | Advanced |
| 59 | eterobarb.mp.               | 12    | Advanced |

|    |                         |      |          |
|----|-------------------------|------|----------|
| 60 | ethotoin.mp.            | 33   | Advanced |
| 61 | ethosuximide.mp.        | 1342 | Advanced |
| 62 | etriacetam.mp.          | 0    | Advanced |
| 63 | fali lepsin.mp.         | 3    | Advanced |
| 64 | felbamate.mp.           | 636  | Advanced |
| 65 | fluoresone.mp.          | 4    | Advanced |
| 66 | flunarizine.mp.         | 1604 | Advanced |
| 67 | fluzinamide.mp.         | 5    | Advanced |
| 68 | fosphenytoin sodium.mp. | 8    | Advanced |
| 69 | gabapentin.mp.          | 3815 | Advanced |
| 70 | ganaxolone.mp.          | 62   | Advanced |
| 71 | harkoseride.mp.         | 8    | Advanced |
| 72 | imidazenil.mp.          | 52   | Advanced |
| 73 | ladoxapriline.mp.       | 0    | Advanced |
| 74 | lamotrigine.mp.         | 3580 | Advanced |
| 75 | lanicemine.mp.          | 1    | Advanced |
| 76 | licarbazepine.mp.       | 32   | Advanced |
| 77 | lorazepam.mp.           | 3555 | Advanced |
| 78 | loreclezole.mp.         | 109  | Advanced |
| 79 | losigamone.mp.          | 41   | Advanced |
| 80 | magnesium sulfate.mp.   | 4867 | Advanced |
| 81 | medazepam.mp.           | 241  | Advanced |
| 82 | mephenytoin.mp.         | 1412 | Advanced |
| 83 | meph?barbital.mp.       | 178  | Advanced |
| 84 | metharbital.mp.         | 19   | Advanced |
| 85 | methylphenobarbital.mp. | 49   | Advanced |
| 86 | mesuximide.mp.          | 9    | Advanced |
| 87 | milacemide.mp.          | 83   | Advanced |
| 88 | nafimidone.mp.          | 22   | Advanced |
| 89 | nitrazepam.mp.          | 1165 | Advanced |
| 90 | normephenytoin.mp.      | 2    | Advanced |
| 91 | normesuximide.mp.       | 0    | Advanced |



|     |                                       |       |          |
|-----|---------------------------------------|-------|----------|
| 92  | oxcarbazepine.mp.                     | 1230  | Advanced |
| 93  | paramethadione.mp.                    | 18    | Advanced |
| 94  | pazinaclone.mp.                       | 22    | Advanced |
| 95  | pentoxyverine.mp.                     | 12    | Advanced |
| 96  | phenacemide.mp.                       | 42    | Advanced |
| 97  | pheneturide.mp.                       | 28    | Advanced |
| 98  | phenobarbital.mp.                     | 22788 | Advanced |
| 99  | phensuximide.mp.                      | 39    | Advanced |
| 100 | phenytoin.mp.                         | 15668 | Advanced |
| 101 | potassium bromide.mp.                 | 397   | Advanced |
| 102 | pregabalin.mp.                        | 1261  | Advanced |
| 103 | primidone.mp.                         | 1604  | Advanced |
| 104 | progabide.mp.                         | 231   | Advanced |
| 105 | ralitoline.mp.                        | 12    | Advanced |
| 106 | remacemide.mp.                        | 127   | Advanced |
| 107 | retigabine.mp.                        | 207   | Advanced |
| 108 | riluzole.mp.                          | 988   | Advanced |
| 109 | ropizine.mp.                          | 12    | Advanced |
| 110 | rufinamide.mp.                        | 107   | Advanced |
| 111 | safinamide.mp.                        | 52    | Advanced |
| 112 | seletracetam.mp.                      | 14    | Advanced |
| 113 | sodium bromide.mp.                    | 392   | Advanced |
| 114 | stiripentol.mp.                       | 114   | Advanced |
| 115 | sultiame.mp.                          | 4     | Advanced |
| 116 | shosaikoto go keishikashakuyakuto.mp. | 0     | Advanced |
| 117 | saiko keishi to.mp.                   | 149   | Advanced |
| 118 | talampanel.mp.                        | 45    | Advanced |
| 119 | taltrimide.mp.                        | 14    | Advanced |
| 120 | tiagabine.mp.                         | 790   | Advanced |
| 121 | topiramate.mp.                        | 2874  | Advanced |
| 122 | thiopental.mp.                        | 7695  | Advanced |
| 123 | tiletamine.mp.                        | 315   | Advanced |

|     |                                                                                                                                                                                                                                                                             |         |          |
|-----|-----------------------------------------------------------------------------------------------------------------------------------------------------------------------------------------------------------------------------------------------------------------------------|---------|----------|
| 124 | trimethadione.mp.                                                                                                                                                                                                                                                           | 541     | Advanced |
| 125 | valproic acid.mp.                                                                                                                                                                                                                                                           | 11094   | Advanced |
| 126 | valproic acid derivative.mp.                                                                                                                                                                                                                                                | 1       | Advanced |
| 127 | valproate magnesium.mp.                                                                                                                                                                                                                                                     | 6       | Advanced |
| 128 | valproate semisodium.mp.                                                                                                                                                                                                                                                    | 25      | Advanced |
| 129 | valpromide.mp.                                                                                                                                                                                                                                                              | 102     | Advanced |
| 130 | valroceamide.mp.                                                                                                                                                                                                                                                            | 14      | Advanced |
| 131 | vigabatrin.mp.                                                                                                                                                                                                                                                              | 1842    | Advanced |
| 132 | zalepion.mp.                                                                                                                                                                                                                                                                | 0       | Advanced |
| 133 | zonisamide.mp.                                                                                                                                                                                                                                                              | 842     | Advanced |
| 134 | (drug adj2 (therap* or treatment? or interven*)).mp.                                                                                                                                                                                                                        | 226932  | Advanced |
| 135 | medication*.mp.                                                                                                                                                                                                                                                             | 182845  | Advanced |
| 136 | (dt or tu or th).fs.                                                                                                                                                                                                                                                        | 3187397 | Advanced |
| 137 | or/9-136                                                                                                                                                                                                                                                                    | 3404830 | Advanced |
| 138 | 8 and 137                                                                                                                                                                                                                                                                   | 4064    | Advanced |
| 139 | exp animals/ not (exp animals/ and exp human/)                                                                                                                                                                                                                              | 3780787 | Advanced |
| 140 | 138 not 139                                                                                                                                                                                                                                                                 | 3440    | Advanced |
| 141 | limit 140 to ("all infant (birth to 23 months)" or "all child (0 to 18 years)" or "newborn infant (birth to 1 month)" or "infant (1 to 23 months)" or "preschool child (2 to 5 years)" or "child (6 to 12 years)" or "adolescent (13 to 18 years)")                         | 1959    | Advanced |
| 142 | limit 140 to ("all adult (19 plus years)" or "young adult (19 to 24 years)" or "adult (19 to 44 years)" or "young adult and adult (19-24 and 19-44)" or "middle age (45 to 64 years)" or "middle aged (45 plus years)" or "all aged (65 and over)" or "aged (80 and over)") | 1641    | Advanced |
| 143 | 141 not 142                                                                                                                                                                                                                                                                 | 1120    | Advanced |
| 144 | 140 not 143                                                                                                                                                                                                                                                                 | 2320    | Advanced |
| 145 | limit 144 to english language                                                                                                                                                                                                                                               | 2071    | Advanced |
| 146 | limit 145 to yr="2009 -Current"                                                                                                                                                                                                                                             | 561     | Advanced |
| 147 | (2009* or 2010* or 2011* or 2012* or 2013*).em.                                                                                                                                                                                                                             | 3179739 | Advanced |
| 148 | 145 and 147                                                                                                                                                                                                                                                                 | 600     | Advanced |
| 149 | 146 or 148                                                                                                                                                                                                                                                                  | 600     | Advanced |

**EMBASE**

Database: EMBASE Classic &lt;1947 to 1979&gt;

Search Strategy:

- 
- 1 (initial adj4 seizure\$.mp. (93)
  - 2 (first adj2 seizure\$.mp. (154)
  - 3 (primary adj2 seizure\$.mp. (26)
  - 4 (first adj2 onset adj2 seizure\$.mp. (1)
  - 5 (early adj2 seizure\$.mp. (56)
  - 6 exp Anticonvulsive Agent/ (35053)
  - 7 (abecarnil or acetazolamide or albutoin or allomethadione or ameltolide).mp. (3096)
  - 8 (antiepilepsirine or ascorbate magnesium or barbexaclone or beclamide or benzobarbital).mp. (131)
  - 9 (brivaracetam or broximumide or calcium bromide or carabersat or caramiphen).mp. (263)
  - 10 (carbamazepine or cinromide or clomethiazole or clonazepam or cyheptamide).mp. (3347)
  - 11 carbamazepine 10,11 oxide.mp. (35)
  - 12 (denzimol or dextromethorphan or dezinamide or diazepam or dimethadione or doxenitoin).mp. (10366)
  - 13 10, 11 dihydro 10,11 dihydroxycarbamazepine.mp. (3)
  - 14 (endixaprine or etazepine or eterobarb or ethosuximide or ethotoin or etriacetam).mp. (1043)
  - 15 (fali lepsin or felbamate or fluoresone or fluzinamide or fosphenytoin sodium or gabapentin).mp. (24)
  - 16 (ganaxolone or harkoseride or imidazenil or ladoxaprine or lamotrigine or lanicemine).mp. (1)
  - 17 2 isopropylvaleramide.mp. (11)
  - 18 (licarbazepine or loreclezole or losigamone or mephebarbital or mephenytoin or mesuximide).mp. (688)
  - 19 (metharbital or methylphenobarbital or milacemide or nafimidone or nitrazepam).mp. (2004)
  - 20 (normephenytoin or normesuximide or oxcarbazepine or paramethadione or pazinaclone).mp. (232)
  - 21 (pentoxyverine or phenacemide or pheneturide or phenobarbital or phensuximide or phenytoin or potassium bromide).mp. (18941)
  - 22 (pregabalin or primidone or progabide or ralitoline or remacemide or retigabine).mp. (1589)
  - 23 2 propyl 2 pentenoic acid.mp. (3)
  - 24 (riluzole or ropizine or rufinamide or safinamide or seletracetam or sodium bromide or stiripentol or sultiame).mp. (619)
  - 25 shosaikoto go keishikashakuyakuto.mp. (1)
  - 26 (talampanel or taltrimide or tigabine or topiramate or trimethadione or valproate calcium).mp. (884)

- 27 (valproate magnesium or valproate semisodium or valproic acid or valproic acid derivative or valpromide).mp. (1019)
- 28 (valroceamide or vigabatrin or zalepion or zonisamide).mp. (26)
- 29 drug therapy/ or anticonvulsant therapy/ or drug intermittent therapy/ or drug treatment failure/ or medication error/ or monotherapy/ or pharmaceutical care/ or polypharmacy/ or single drug dose/ or drug combination/ (102453)
- 30 (drug therapy or drug therapies or medication\$ or drug treatment\$ or drug intervention\$).mp. (101878)
- 31 (antiepileptic\$ or anticonvulsant\$ or anticonvulsive\$).mp. (6750)
- 32 or/1-5 (317)
- 33 or/6-31 (137832)
- 34 and/32-33 (92)
- 35 limit 34 to (human and english language and yr="1966 - 1980" and (adult <18 to 64 years> or aged <65+ years>)) (0)

Database: EMBASE Classic <1947 to 1979>

Search Strategy:

- 
- 1 (initial adj4 seizure\$.mp. (93)
  - 2 (first adj2 seizure\$.mp. (154)
  - 3 (primary adj2 seizure\$.mp. (26)
  - 4 (first adj2 onset adj2 seizure\$.mp. (1)
  - 5 (early adj2 seizure\$.mp. (56)
  - 6 patient satisfaction/ (109)
  - 7 (patient adj2 prefer\$.mp. (114)
  - 8 (patient adj2 satisf\$.mp. (774)
  - 9 patient education/ (46)
  - 10 (patient adj2 educat\$.mp. (2557)
  - 11 counseling/ or anticipatory guidance/ or directive counseling/ or patient counseling/  
or patient guidance/ (2226)
  - 12 counsel\$.mp. (6521)
  - 13 car driving/ or driving ability/ (1283)
  - 14 safety/ or traffic safety/ (7754)
  - 15 (driving or safety).mp. (16767)
  - 16 or/6-15 (26480)
  - 17 or/1-5 (317)
  - 18 and/16-17 (11)
  - 19 limit 18 to (human and english language and yr="1966 - 1979" and (conference  
paper or journal or proceeding) and (adult <18 to 64 years> or aged <65+ years>)) (0)

Database: EMBASE Classic <1947 to 1979>

Search Strategy:

- 
- 1 (initial adj4 seizure\$.mp. (93)
  - 2 (first adj2 seizure\$.mp. (154)
  - 3 (primary adj2 seizure\$.mp. (26)
  - 4 (first adj2 onset adj2 seizure\$.mp. (1)
  - 5 (early adj2 seizure\$.mp. (56)
  - 6 prognosis/ (28506)
  - 7 treatment outcome/ or disease free interval/ or treatment failure/ or drug treatment failure/ (386)
  - 8 risk/ or attributable risk/ or recurrence risk/ or risk assessment/ or risk factor/ or risk reduction/ (23452)
  - 9 (prognos\$ or risk\$.mp. (96512)
  - 10 Recurrent Disease/ (777)
  - 11 recurr\$.mp. (53807)
  - 12 or/1-5 (317)
  - 13 or/6-11 (143627)
  - 14 and/12-13 (61)
  - 15 limit 14 to (human and english language and yr="1966 - 1979" and (conference paper or journal or proceeding) and (adult <18 to 64 years> or aged <65+ years>)) (0)

Database: EMBASE <1980 to 2009 Week 23>

Search Strategy:

- 
- 1 (initial adj4 seizure\$.mp. (585)
  - 2 (new adj2 onset adj4 seizure\$.mp. (311)
  - 3 (first adj2 seizure\$.mp. (1103)
  - 4 (de novo adj4 seizure\$.mp. (23)
  - 5 (newly adj2 diagnosed adj4 seizure\$.mp. (119)
  - 6 (primary adj2 seizure\$.mp. (170)
  - 7 (first adj2 onset adj2 seizure\$.mp. (14)
  - 8 (first adj2 episode adj2 seizure\$.mp. (14)
  - 9 (early adj2 seizure\$.mp. (618)
  - 10 or/1-9 (2736)
  - 11 exp Anticonvulsive Agent/ (166985)
  - 12 (abecarnil or acetazolamide or albutoin or allomethadione or ameltolide).mp. (9874)
  - 13 (antiepilepsirine or ascorbate magnesium or barbexaclone or beclamide or benzobarbital).mp. (310)
  - 14 5 benzylidenehydantoin.mp. (6)
  - 15 (brivaracetam or broximide or calcium bromide or carabersat or caramiphen).mp. (240)
  - 16 (carbamazepine or cinromide or clomethiazole or clonazepam or cyheptamide).mp. (46647)
  - 17 carbamazepine 10,11 oxide.mp. (588)
  - 18 (denzimol or dextromethorphan or dezinamide or diazepam or dimethadione or doxenitoin).mp. (49588)
  - 19 10, 11 dihydro 10,11 dihydroxycarbamazepine.mp. (99)
  - 20 (endixaprine or etazepine or eterobarb or ethosuximide or ethotoin or etriacetam).mp. (4225)
  - 21 (fali lepsin or felbamate or fluoresone or fluzinamide or fosphenytoin sodium or gabapentin).mp. (13621)
  - 22 (ganaxolone or harkoseride or imidazenil or ladoxaprine or lamotrigine or lanicemine).mp. (10534)
  - 23 2 isopropylvaleramide.mp. (39)
  - 24 (licarbazepine or loreclezole or losigamone or mephebarbital or mephenytoin or mesuximide).mp. (2289)
  - 25 (metharbital or methylphenobarbital or milacemide or nafimidone or nitrazepam).mp. (4925)
  - 26 1 methyl 1,2 diphenylethylamine.mp. (54)
  - 27 (normephenytoin or normesuximide or oxcarbazepine or paramethadione or pazinaclone).mp. (4494)
  - 28 (pentoxyverine or phenacemide or pheneturide or phenobarbital or phensuximide or phenytoin or potassium bromide).mp. (57807)
  - 29 (pregabalin or primidone or progabide or ralitoline or remacemide or retigabine).mp. (8324)
  - 30 2 propyl 2 pentenoic acid.mp. (69)
  - 31 2 propyl 4 pentenoic acid.mp. (75)

- 32 (riluzole or ropizine or rufinamide or safinamide or seletracetam or sodium bromide or stiripentol or sultiame).mp. (3225)
- 33 SC 1001A.mp. (3)
- 34 shosaikoto go keishikashakuyakuto.mp. (87)
- 35 (talampanel or taltrimide or tigabine or topiramate or trimethadione or valproate calcium).mp. (9072)
- 36 (valproate magnesium or valproate semisodium or valproic acid or valproic acid derivative or valpromide).mp. (31617)
- 37 4 valproylaminobutyric acid.mp. (4)
- 38 (valroceamide or vigabatrin or zalepion or zonisamide).mp. (6609)
- 39 (dt or tu or th).fs. (1839636)
- 40 drug therapy/ or anticonvulsant therapy/ or drug intermittent therapy/ or drug treatment failure/ or medication error/ or monotherapy/ or pharmaceutical care/ or polypharmacy/ or single drug dose/ or drug combination/ (259087)
- 41 (drug therapy or drug therapies or medication\$ or drug treatment\$ or drug intervention\$).mp. (345727)
- 42 (antiepileptic\$ or anticonvulsant\$ or anticonvulsive\$).mp. (46721)
- 43 or/11-42 (2165006)
- 44 and/10,43 (1382)
- 45 limit 44 to (human and english language and yr="1980 -Current" and (conference paper or journal or proceeding) and (adult <18 to 64 years> or aged <65+ years>)) (464)
- 46 limit 45 to (book or book series or editorial or letter or note or report or "review" or short survey) (32)
- 47 45 not 46 (432)



Database: EMBASE <1980 to 2009 Week 23>

Search Strategy:

- 
- 1 (initial adj4 seizure\$.mp. (585)
  - 2 (new adj2 onset adj4 seizure\$.mp. (311)
  - 3 (first adj2 seizure\$.mp. (1103)
  - 4 (de novo adj4 seizure\$.mp. (23)
  - 5 (newly adj2 diagnosed adj4 seizure\$.mp. (119)
  - 6 (primary adj2 seizure\$.mp. (170)
  - 7 (first adj2 onset adj2 seizure\$.mp. (14)
  - 8 (first adj2 episode adj2 seizure\$.mp. (14)
  - 9 (early adj2 seizure\$.mp. (618)
  - 10 or/1-9 (2736)
  - 11 patient satisfaction/ (36598)
  - 12 (patient adj2 prefer\$.mp. (2888)
  - 13 (patient adj2 satisf\$.mp. (38755)
  - 14 patient education/ (27616)
  - 15 (patient adj2 educat\$.mp. (30111)
  - 16 counseling/ or anticipatory guidance/ or directive counseling/ or patient counseling/  
or patient guidance/ (31242)
  - 17 counsel\$.mp. (61141)
  - 18 car driving/ or driving ability/ (5830)
  - 19 safety/ or traffic safety/ (49458)
  - 20 (driving or safety).mp. (295742)
  - 21 or/11-20 (413500)
  - 22 and/10,21 (162)
  - 23 limit 22 to (human and english language and yr="1980 -Current" and (conference  
paper or journal or proceeding) and (adult <18 to 64 years> or aged <65+ years>)) (61)
  - 24 limit 23 to (book or book series or editorial or letter or note or report or "review" or  
short survey) (8)
  - 25 23 not 24 (53)
  - 26 find similar to Should patients with psychogenic nonepileptic seizures be allowed to  
drive? (97)
  - 27 from 26 keep 1,3,7,10,16,19-22,30,32,43,45,51-52,61-62,65,74,88,92-93,95-96 (24)

Database: EMBASE <1980 to 2009 Week 23>

Search Strategy:

- 
- 1 (initial adj4 seizure\$.mp. (585)
  - 2 (new adj2 onset adj4 seizure\$.mp. (311)
  - 3 (first adj2 seizure\$.mp. (1103)
  - 4 (de novo adj4 seizure\$.mp. (23)
  - 5 (newly adj2 diagnosed adj4 seizure\$.mp. (119)
  - 6 (primary adj2 seizure\$.mp. (170)
  - 7 (first adj2 onset adj2 seizure\$.mp. (14)
  - 8 (first adj2 episode adj2 seizure\$.mp. (14)
  - 9 (early adj2 seizure\$.mp. (618)
  - 10 or/1-9 (2736)
  - 11 prognosis/ (188946)
  - 12 treatment outcome/ or disease free interval/ or treatment failure/ or drug treatment failure/ (377495)
  - 13 risk/ or attributable risk/ or recurrence risk/ or risk assessment/ or risk factor/ or risk reduction/ (440857)
  - 14 (prognos\$ or risk\$.mp. (1167634)
  - 15 or/11-14 (1457524)
  - 16 Recurrent Disease/ (55273)
  - 17 recurr\$.mp. (278145)
  - 18 or/16-17 (278145)
  - 19 and/10,15,18 (304)
  - 20 or/11-14,16-17 (1623040)
  - 21 and/10,20 (1191)
  - 22 or/19,21 (1191)
  - 23 limit 22 to (human and english language and yr="1980 -Current" and (conference paper or journal or proceeding) and (adult <18 to 64 years> or aged <65+ years>)) (434)
  - 24 limit 23 to (book or book series or editorial or letter or note or report or "review" or short survey) (34)
  - 25 23 not 24 (400)
  - 26 (initial adj4 seizure\$.mp. (585)
  - 27 (new adj2 onset adj4 seizure\$.mp. (311)
  - 28 (first adj2 seizure\$.mp. (1103)
  - 29 (de novo adj4 seizure\$.mp. (23)
  - 30 (newly adj2 diagnosed adj4 seizure\$.mp. (119)
  - 31 (primary adj2 seizure\$.mp. (170)
  - 32 (first adj2 onset adj2 seizure\$.mp. (14)
  - 33 (first adj2 episode adj2 seizure\$.mp. (14)
  - 34 (early adj2 seizure\$.mp. (618)
  - 35 or/26-34 (2736)
  - 36 exp Anticonvulsive Agent/ (166985)
  - 37 (abecarnil or acetazolamide or albutoin or allomethadione or ameltolide).mp. (9874)
  - 38 (antiepilepsirine or ascorbate magnesium or barbexaclone or beclamide or benzobarbital).mp. (310)

- 39 5 benzylidenehydantoin.mp. (6)
- 40 (brivaracetam or broximide or calcium bromide or carbamazepine or carbamazepine).mp. (240)
- 41 (carbamazepine or cinromide or clomethiazole or clonazepam or cyheptamide).mp. (46647)
- 42 carbamazepine 10,11 oxide.mp. (588)
- 43 (denzimol or dextromethorphan or dezamide or diazepam or dimethadione or doxinitoin).mp. (49588)
- 44 10, 11 dihydro 10,11 dihydroxycarbamazepine.mp. (99)
- 45 (endixaprine or etazepine or etobarb or ethosuximide or ethoin or etriacetam).mp. (4225)
- 46 (fali lepsin or felbamate or fluorenone or fluzinamide or fosphenytoin sodium or gabapentin).mp. (13621)
- 47 (ganaxolone or harkoseride or imidazenil or ladoxaprine or lamotrigine or lanicemine).mp. (10534)
- 48 2 isopropylvaleramide.mp. (39)
- 49 (licarbazepine or loreclezole or losigamone or mephebarbital or mephenytoin or mesuximide).mp. (2289)
- 50 (metharbital or methylphenobarbital or milacemide or nafimidone or nitrazepam).mp. (4925)
- 51 1 methyl 1,2 diphenylethylamine.mp. (54)
- 52 (normephenytoin or normesuximide or oxcarbazepine or paramethadione or pazinaclone).mp. (4494)
- 53 (pentoxyverine or phenacemide or pheneturide or phenobarbital or phensuximide or phenytoin or potassium bromide).mp. (57807)
- 54 (pregabalin or primidone or progabide or ralitoline or remacemide or retigabine).mp. (8324)
- 55 2 propyl 2 pentenoic acid.mp. (69)
- 56 2 propyl 4 pentenoic acid.mp. (75)
- 57 (riluzole or ropizine or rufinamide or safinamide or seletracetam or sodium bromide or stiripentol or sultiame).mp. (3225)
- 58 SC 1001A.mp. (3)
- 59 shosaikoto go keishikashakuyakuto.mp. (87)
- 60 (talampanel or taltrimide or tigabine or topiramate or trimethadione or valproate calcium).mp. (9072)
- 61 (valproate magnesium or valproate semisodium or valproic acid or valproic acid derivative or valpromide).mp. (31617)
- 62 4 valproylaminobutyric acid.mp. (4)
- 63 (valroceamide or vigabatrin or zalepion or zonisamide).mp. (6609)
- 64 (dt or tu or th).fs. (1839636)
- 65 drug therapy/ or anticonvulsant therapy/ or drug intermittent therapy/ or drug treatment failure/ or medication error/ or monotherapy/ or pharmaceutical care/ or polypharmacy/ or single drug dose/ or drug combination/ (259087)
- 66 (drug therapy or drug therapies or medication\$ or drug treatment\$ or drug intervention\$).mp. (345727)
- 67 (antiepileptic\$ or anticonvulsant\$ or anticonvulsive\$).mp. (46721)

68 or/36-67 (2165006)

69 and/35,68 (1382)

70 limit 69 to (human and english language and yr="1980 -Current" and (conference paper or journal or proceeding) and (adult <18 to 64 years> or aged <65+ years>)) (464)

71 limit 70 to (book or book series or editorial or letter or note or report or "review" or short survey) (32)

72 70 not 71 (432)

73 25 not 72 (177)

## Embase 1974 to 2013 February 28

| #  | Searches                           | Results | Search Type |
|----|------------------------------------|---------|-------------|
| 1  | (onset adj4 seizure?).mp.          | 8497    | Advanced    |
| 2  | (first adj4 seizure?).mp.          | 3738    | Advanced    |
| 3  | ((new or newly) adj4 seizure?).mp. | 1445    | Advanced    |
| 4  | (initial adj4 seizure?).mp.        | 1076    | Advanced    |
| 5  | (early adj4 seizure?).mp.          | 2293    | Advanced    |
| 6  | (primar* adj4 seizure?).mp.        | 1675    | Advanced    |
| 7  | (de novo adj4 seizure?).mp.        | 45      | Advanced    |
| 8  | or/1-7                             | 15769   | Advanced    |
| 9  | patient satisfaction/              | 77763   | Advanced    |
| 10 | patient preference/                | 2737    | Advanced    |
| 11 | safety/                            | 137640  | Advanced    |
| 12 | patient safety/                    | 39689   | Advanced    |
| 13 | car driving/                       | 10817   | Advanced    |
| 14 | driving ability/                   | 5093    | Advanced    |
| 15 | traffic accident/                  | 43449   | Advanced    |
| 16 | traffic safety/                    | 2777    | Advanced    |
| 17 | driving*.mp.                       | 57085   | Advanced    |
| 18 | patient education/                 | 81887   | Advanced    |
| 19 | Education/                         | 282746  | Advanced    |
| 20 | (patient? adj2 educat*).mp.        | 107233  | Advanced    |
| 21 | counseling/                        | 36162   | Advanced    |
| 22 | patient counseling/                | 28715   | Advanced    |
| 23 | directive counseling/              | 465     | Advanced    |
| 24 | anticipatory guidance/             | 172     | Advanced    |
| 25 | patient guidance/                  | 946     | Advanced    |
| 26 | or/9-25                            | 753014  | Advanced    |
| 27 | 8 and 26                           | 647     | Advanced    |

|                                                                      |         |          |
|----------------------------------------------------------------------|---------|----------|
| 28 (seizure? adj10 driving*).mp.                                     | 275     | Advanced |
| 29 27 or 28                                                          | 872     | Advanced |
| limit 29 to (book or book series or conference abstract or           |         |          |
| 30 conference paper or conference proceeding or "conference review") | 373     | Advanced |
| 31 29 not 30                                                         | 499     | Advanced |
| 32 limit 31 to yr="2009 -Current"                                    | 141     | Advanced |
| 33 (2009* or 2010* or 2011* or 2012* or 2013*).em.                   | 4964197 | Advanced |
| 34 31 and 33                                                         | 150     | Advanced |
| 35 32 or 34                                                          | 151     | Advanced |
| 36 limit 35 to english language                                      | 135     | Advanced |

## Embase 1974 to 2013 March 07

| #  | Searches                                                                                                         | Results | Search Type |
|----|------------------------------------------------------------------------------------------------------------------|---------|-------------|
| 1  | (onset adj4 seizure?).mp.                                                                                        | 8506    | Advanced    |
| 2  | (first adj4 seizure?).mp.                                                                                        | 3739    | Advanced    |
| 3  | ((new or newly) adj4 seizure?).mp.                                                                               | 1448    | Advanced    |
| 4  | (initial adj4 seizure?).mp.                                                                                      | 1076    | Advanced    |
| 5  | (early adj4 seizure?).mp.                                                                                        | 2297    | Advanced    |
| 6  | (primar* adj4 seizure?).mp.                                                                                      | 1678    | Advanced    |
| 7  | (de novo adj4 seizure?).mp.                                                                                      | 45      | Advanced    |
| 8  | or/1-7                                                                                                           | 15786   | Advanced    |
| 9  | prognosis/                                                                                                       | 409451  | Advanced    |
| 10 | treatment outcome/                                                                                               | 616536  | Advanced    |
| 11 | disease free interval/                                                                                           | 2006    | Advanced    |
| 12 | exp treatment failure/                                                                                           | 75710   | Advanced    |
| 13 | nomogram/                                                                                                        | 3408    | Advanced    |
| 14 | risk/                                                                                                            | 237701  | Advanced    |
| 15 | attributable risk/                                                                                               | 1843    | Advanced    |
| 16 | risk factor/                                                                                                     | 563131  | Advanced    |
| 17 | risk assessment/                                                                                                 | 307114  | Advanced    |
| 18 | recurrence risk/                                                                                                 | 28439   | Advanced    |
| 19 | risk reduction/                                                                                                  | 52072   | Advanced    |
| 20 | recurrent disease/                                                                                               | 126252  | Advanced    |
| 21 | prognos*.mp.                                                                                                     | 632462  | Advanced    |
| 22 | risk*.mp.                                                                                                        | 2022767 | Advanced    |
| 23 | recurr*.mp.                                                                                                      | 574256  | Advanced    |
| 24 | or/9-23                                                                                                          | 3363764 | Advanced    |
| 25 | 8 and 24                                                                                                         | 5388    | Advanced    |
| 26 | (exp animals/ or exp animal experimentation/) not ((exp animals/ or exp animal experimentation/) and exp human/) | 4377401 | Advanced    |
| 27 | 25 not 26                                                                                                        | 5065    | Advanced    |

|    |                                                                                                                                                                                            |         |          |
|----|--------------------------------------------------------------------------------------------------------------------------------------------------------------------------------------------|---------|----------|
| 28 | limit 27 to (book or book series or conference abstract or conference paper or conference proceeding or "conference review" or note)                                                       | 1078    | Advanced |
| 29 | 27 not 28                                                                                                                                                                                  | 3987    | Advanced |
| 30 | limit 29 to (embryo <first trimester> or infant <to one year> or child <unspecified age> or preschool child <1 to 6 years> or school child <7 to 12 years> or adolescent <13 to 17 years>) | 1747    | Advanced |
| 31 | limit 29 to (adult <18 to 64 years> or aged <65+ years>)                                                                                                                                   | 1722    | Advanced |
| 32 | 30 not 31                                                                                                                                                                                  | 1005    | Advanced |
| 33 | 29 not 32                                                                                                                                                                                  | 2982    | Advanced |
| 34 | limit 33 to yr="2009 -Current"                                                                                                                                                             | 862     | Advanced |
| 35 | (2009* or 2010* or 2011* or 2012* or 2013*).em.                                                                                                                                            | 4984266 | Advanced |
| 36 | 33 and 35                                                                                                                                                                                  | 915     | Advanced |
| 37 | 34 or 36                                                                                                                                                                                   | 922     | Advanced |
| 38 | limit 37 to english language                                                                                                                                                               | 823     | Advanced |
| 39 | limit 38 to embase                                                                                                                                                                         | 760     | Advanced |



## Embase 1974 to 2013 March 14

| #  | Searches                            | Results | Search Type |
|----|-------------------------------------|---------|-------------|
| 1  | (onset adj4 seizure?).mp.           | 8513    | Advanced    |
| 2  | (first adj4 seizure?).mp.           | 3741    | Advanced    |
| 3  | ((new or newly) adj4 seizure?).mp.  | 1448    | Advanced    |
| 4  | (initial adj4 seizure?).mp.         | 1077    | Advanced    |
| 5  | (early adj4 seizure?).mp.           | 2297    | Advanced    |
| 6  | (primar* adj4 seizure?).mp.         | 1683    | Advanced    |
| 7  | (de novo adj4 seizure?).mp.         | 45      | Advanced    |
| 8  | or/1-7                              | 15801   | Advanced    |
| 9  | exp anticonvulsive agent/           | 277763  | Advanced    |
| 10 | anticonvulsant therapy/             | 5338    | Advanced    |
| 11 | drug therapy/                       | 346066  | Advanced    |
| 12 | drug intermittent therapy/          | 3342    | Advanced    |
| 13 | exp drug combination/               | 177671  | Advanced    |
| 14 | single drug dose/                   | 40843   | Advanced    |
| 15 | monotherapy/                        | 55429   | Advanced    |
| 16 | drug treatment failure/             | 14619   | Advanced    |
| 17 | medication error/                   | 11364   | Advanced    |
| 18 | pharmaceutical care/                | 10590   | Advanced    |
| 19 | polypharmacy/                       | 5768    | Advanced    |
| 20 | antiepileptic*.mp.                  | 24033   | Advanced    |
| 21 | anti-epileptic*.mp.                 | 3711    | Advanced    |
| 22 | anticonvuls*.mp.                    | 74805   | Advanced    |
| 23 | anti-convuls*.mp.                   | 1112    | Advanced    |
| 24 | antiepilepsirine*.mp.               | 41      | Advanced    |
| 25 | 1 methyl 1,2 diphenylethylamine.mp. | 56      | Advanced    |
| 26 | 2 isopropylvaleramide.mp.           | 61      | Advanced    |
| 27 | 2 propyl 2 pentenoic acid.mp.       | 82      | Advanced    |

|    |                                                 |       |          |
|----|-------------------------------------------------|-------|----------|
| 28 | 2 propyl 4 pentenoic acid.mp.                   | 88    | Advanced |
| 29 | 4 valproylaminobutyric acid.mp.                 | 4     | Advanced |
| 30 | 5 benzylidenehydantoin.mp.                      | 7     | Advanced |
| 31 | 10, 11 dihydro 10,11 dihydroxycarbamazepine.mp. | 123   | Advanced |
| 32 | carbamazepine 10,11 oxide.mp.                   | 703   | Advanced |
| 33 | SC 1001A.mp.                                    | 3     | Advanced |
| 34 | abecarnil.mp.                                   | 255   | Advanced |
| 35 | acetazolamide.mp.                               | 16346 | Advanced |
| 36 | albutoin.mp.                                    | 28    | Advanced |
| 37 | allomethadione.mp.                              | 8     | Advanced |
| 38 | ameltolide.mp.                                  | 47    | Advanced |
| 39 | ascorbate magnesium.mp.                         | 49    | Advanced |
| 40 | barbexaclone.mp.                                | 188   | Advanced |
| 41 | beclamide.mp.                                   | 103   | Advanced |
| 42 | benzobarbital.mp.                               | 133   | Advanced |
| 43 | brivaracetam.mp.                                | 179   | Advanced |
| 44 | bromides.mp.                                    | 3534  | Advanced |
| 45 | brosuximide.mp.                                 | 12    | Advanced |
| 46 | calcium bromide.mp.                             | 74    | Advanced |
| 47 | carabersat.mp.                                  | 44    | Advanced |
| 48 | caramiphen.mp.                                  | 165   | Advanced |
| 49 | carbamazepine.mp.                               | 51013 | Advanced |
| 50 | cinromide.mp.                                   | 67    | Advanced |
| 51 | cyheptamide.mp.                                 | 42    | Advanced |
| 52 | chlormethiazole.mp.                             | 542   | Advanced |
| 53 | clonazepam.mp.                                  | 19594 | Advanced |
| 54 | clorazepate dipotassium.mp.                     | 1893  | Advanced |
| 55 | denzimol.mp.                                    | 50    | Advanced |
| 56 | dextromethorphan.mp.                            | 5935  | Advanced |
| 57 | dezinamide.mp.                                  | 22    | Advanced |
| 58 | diazepam.mp.                                    | 67990 | Advanced |
| 59 | doxenitoin.mp.                                  | 13    | Advanced |

|    |                         |       |          |
|----|-------------------------|-------|----------|
| 60 | dimethadione.mp.        | 449   | Advanced |
| 61 | endixaprine.mp.         | 15    | Advanced |
| 62 | estazolam.mp.           | 995   | Advanced |
| 63 | etazepine.mp.           | 3     | Advanced |
| 64 | eterobarb.mp.           | 35    | Advanced |
| 65 | ethotoin.mp.            | 251   | Advanced |
| 66 | ethosuximide.mp.        | 6074  | Advanced |
| 67 | etriacetam.mp.          | 0     | Advanced |
| 68 | fali lepsin.mp.         | 37    | Advanced |
| 69 | felbamate.mp.           | 2901  | Advanced |
| 70 | fluoresone.mp.          | 7     | Advanced |
| 71 | flunarizine.mp.         | 4635  | Advanced |
| 72 | fluzinamide.mp.         | 9     | Advanced |
| 73 | fosphenytoin sodium.mp. | 1331  | Advanced |
| 74 | gabapentin.mp.          | 19195 | Advanced |
| 75 | ganaxolone.mp.          | 199   | Advanced |
| 76 | harkoseride.mp.         | 981   | Advanced |
| 77 | imidazenil.mp.          | 93    | Advanced |
| 78 | ladoxaprine.mp.         | 13    | Advanced |
| 79 | lamotrigine.mp.         | 16511 | Advanced |
| 80 | lanicemine.mp.          | 73    | Advanced |
| 81 | licarbazepine.mp.       | 264   | Advanced |
| 82 | lorazepam.mp.           | 19960 | Advanced |
| 83 | loreclezole.mp.         | 183   | Advanced |
| 84 | losigamone.mp.          | 140   | Advanced |
| 85 | magnesium sulfat.mp.    | 12076 | Advanced |
| 86 | medazepam.mp.           | 1325  | Advanced |
| 87 | mephenytoin.mp.         | 2142  | Advanced |
| 88 | meph?barbital.mp.       | 166   | Advanced |
| 89 | metharbital.mp.         | 183   | Advanced |
| 90 | methylphenobarbital.mp. | 987   | Advanced |
| 91 | mesuximide.mp.          | 659   | Advanced |

|     |                                       |       |          |
|-----|---------------------------------------|-------|----------|
| 92  | milacemide.mp.                        | 230   | Advanced |
| 93  | nafimidone.mp.                        | 60    | Advanced |
| 94  | nitrazepam.mp.                        | 6356  | Advanced |
| 95  | normephenytoin.mp.                    | 141   | Advanced |
| 96  | normesuximide.mp.                     | 60    | Advanced |
| 97  | oxcarbazepine.mp.                     | 6893  | Advanced |
| 98  | paramethadione.mp.                    | 232   | Advanced |
| 99  | pazinaclone.mp.                       | 42    | Advanced |
| 100 | pentoxyverine.mp.                     | 234   | Advanced |
| 101 | phenacemide.mp.                       | 266   | Advanced |
| 102 | pheneturide.mp.                       | 253   | Advanced |
| 103 | phenobarbital.mp.                     | 58865 | Advanced |
| 104 | phensuximide.mp.                      | 264   | Advanced |
| 105 | phenytoin.mp.                         | 55293 | Advanced |
| 106 | potassium bromide.mp.                 | 893   | Advanced |
| 107 | pregabalin.mp.                        | 6244  | Advanced |
| 108 | primidone.mp.                         | 7926  | Advanced |
| 109 | progabide.mp.                         | 582   | Advanced |
| 110 | ralitoline.mp.                        | 51    | Advanced |
| 111 | remacemide.mp.                        | 542   | Advanced |
| 112 | retigabine.mp.                        | 633   | Advanced |
| 113 | riluzole.mp.                          | 2839  | Advanced |
| 114 | ropizine.mp.                          | 51    | Advanced |
| 115 | rufinamide.mp.                        | 552   | Advanced |
| 116 | safinamide.mp.                        | 187   | Advanced |
| 117 | seletracetam.mp.                      | 45    | Advanced |
| 118 | sodium bromide.mp.                    | 844   | Advanced |
| 119 | stiripentol.mp.                       | 455   | Advanced |
| 120 | sultiame.mp.                          | 966   | Advanced |
| 121 | shosaikoto go keishikashakuyakuto.mp. | 126   | Advanced |
| 122 | saiko keishi to.mp.                   | 88    | Advanced |
| 123 | talampanel.mp.                        | 306   | Advanced |

|     |                                                                                                                                                                                             |         |          |
|-----|---------------------------------------------------------------------------------------------------------------------------------------------------------------------------------------------|---------|----------|
| 124 | taltrimide.mp.                                                                                                                                                                              | 30      | Advanced |
| 125 | tiagabine.mp.                                                                                                                                                                               | 3386    | Advanced |
| 126 | topiramate.mp.                                                                                                                                                                              | 13785   | Advanced |
| 127 | thiopental.mp.                                                                                                                                                                              | 23523   | Advanced |
| 128 | tiletamine.mp.                                                                                                                                                                              | 446     | Advanced |
| 129 | trimethadione.mp.                                                                                                                                                                           | 1614    | Advanced |
| 130 | valproic acid.mp.                                                                                                                                                                           | 44292   | Advanced |
| 131 | valproic acid derivative.mp.                                                                                                                                                                | 269     | Advanced |
| 132 | valproate magnesium.mp.                                                                                                                                                                     | 142     | Advanced |
| 133 | valproate semisodium.mp.                                                                                                                                                                    | 4306    | Advanced |
| 134 | valpromide.mp.                                                                                                                                                                              | 561     | Advanced |
| 135 | valrocemide.mp.                                                                                                                                                                             | 64      | Advanced |
| 136 | vigabatrin.mp.                                                                                                                                                                              | 6379    | Advanced |
| 137 | zalepion.mp.                                                                                                                                                                                | 2       | Advanced |
| 138 | zonisamide.mp.                                                                                                                                                                              | 4144    | Advanced |
| 139 | (drug adj2 (therap* or treatment? or interven*)).mp.                                                                                                                                        | 464496  | Advanced |
| 140 | medication*.mp.                                                                                                                                                                             | 263760  | Advanced |
| 141 | (dt or tu or th).fs.                                                                                                                                                                        | 3746659 | Advanced |
| 142 | or/9-141                                                                                                                                                                                    | 4425221 | Advanced |
| 143 | 8 and 142                                                                                                                                                                                   | 7500    | Advanced |
| 144 | (exp animals/ or exp animal experimentation/) not ((exp animals/ or exp animal experimentation/) and exp human/)                                                                            | 4379925 | Advanced |
| 145 | 143 not 144                                                                                                                                                                                 | 6656    | Advanced |
| 146 | limit 145 to (book or book series or conference abstract or conference paper or conference proceeding or "conference review" or note or report)                                             | 1533    | Advanced |
| 147 | 145 not 146                                                                                                                                                                                 | 5123    | Advanced |
| 148 | limit 147 to (embryo <first trimester> or infant <to one year> or child <unspecified age> or preschool child <1 to 6 years> or school child <7 to 12 years> or adolescent <13 to 17 years>) | 1967    | Advanced |
| 149 | limit 147 to (adult <18 to 64 years> or aged <65+ years>)                                                                                                                                   | 2128    | Advanced |
| 150 | 148 not 149                                                                                                                                                                                 | 1176    | Advanced |
| 151 | 147 not 150                                                                                                                                                                                 | 3947    | Advanced |

|                                                     |         |          |
|-----------------------------------------------------|---------|----------|
| 152 limit 151 to english language                   | 3372    | Advanced |
| 153 limit 152 to yr="2009 -Current"                 | 1133    | Advanced |
| 154 (2009* or 2010* or 2011* or 2012* or 2013*).em. | 5007862 | Advanced |
| 155 152 and 154                                     | 1197    | Advanced |
| 156 153 or 155                                      | 1203    | Advanced |
| 157 limit 156 to embase                             | 1127    | Advanced |

**DARE**

## EBM Reviews - Database of Abstracts of Reviews of Effects 1st Quarter 2013

| #  | Searches                                             | Results | Search Type |
|----|------------------------------------------------------|---------|-------------|
| 1  | (onset adj4 seizure?).mp.                            | 4       | Advanced    |
| 2  | (first adj4 seizure?).mp.                            | 3       | Advanced    |
| 3  | ((new or newly) adj4 seizure?).mp.                   | 2       | Advanced    |
| 4  | (initial adj4 seizure?).mp.                          | 0       | Advanced    |
| 5  | (early adj4 seizure?).mp.                            | 3       | Advanced    |
| 6  | (primar* adj4 seizure?).mp.                          | 9       | Advanced    |
| 7  | (de novo adj4 seizure?).mp.                          | 0       | Advanced    |
| 8  | or/1-7                                               | 17      | Advanced    |
| 9  | (patient? adj2 satisfact*).mp.                       | 526     | Advanced    |
| 10 | (patient? adj2 prefer*).mp.                          | 202     | Advanced    |
| 11 | safet*.mp.                                           | 2404    | Advanced    |
| 12 | (patient? adj2 safet*).mp.                           | 121     | Advanced    |
| 13 | ((automobile? or car?) adj2 (drive* or driving)).mp. | 27      | Advanced    |
| 14 | accident*.mp.                                        | 302     | Advanced    |
| 15 | (traffic adj2 safe*).mp.                             | 9       | Advanced    |
| 16 | driving*.mp.                                         | 44      | Advanced    |
| 17 | educat*.mp.                                          | 1788    | Advanced    |
| 18 | (patient? adj2 educat*).mp.                          | 458     | Advanced    |
| 19 | counsel*.mp.                                         | 687     | Advanced    |
| 20 | or/9-19                                              | 4956    | Advanced    |
| 21 | 8 and 20                                             | 8       | Advanced    |
| 22 | (seizure? adj10 driving*).mp.                        | 0       | Advanced    |
| 23 | 21 or 22                                             | 8       | Advanced    |

---

## EBM Reviews - Database of Abstracts of Reviews of Effects 1st Quarter 2013

| #  | Searches                                        | Results | Search Type |
|----|-------------------------------------------------|---------|-------------|
| 1  | (onset adj4 seizure?).mp.                       | 4       | Advanced    |
| 2  | (first adj4 seizure?).mp.                       | 3       | Advanced    |
| 3  | ((new or newly) adj4 seizure?).mp.              | 2       | Advanced    |
| 4  | (initial adj4 seizure?).mp.                     | 0       | Advanced    |
| 5  | (early adj4 seizure?).mp.                       | 3       | Advanced    |
| 6  | (primar* adj4 seizure?).mp.                     | 9       | Advanced    |
| 7  | (de novo adj4 seizure?).mp.                     | 0       | Advanced    |
| 8  | or/1-7                                          | 17      | Advanced    |
| 9  | antiepileptic*.mp.                              | 39      | Advanced    |
| 10 | anti-epileptic*.mp.                             | 24      | Advanced    |
| 11 | anticonvuls*.mp.                                | 124     | Advanced    |
| 12 | anti-convuls*.mp.                               | 4       | Advanced    |
| 13 | antiepilepsirine*.mp.                           | 0       | Advanced    |
| 14 | 1 methyl 1,2 diphenylethylamine.mp.             | 0       | Advanced    |
| 15 | 2 isopropylvaleramide.mp.                       | 0       | Advanced    |
| 16 | 2 propyl 2 pentenoic acid.mp.                   | 0       | Advanced    |
| 17 | 2 propyl 4 pentenoic acid.mp.                   | 0       | Advanced    |
| 18 | 4 valproylaminobutyric acid.mp.                 | 0       | Advanced    |
| 19 | 5 benzylidenehydantoin.mp.                      | 0       | Advanced    |
| 20 | 10, 11 dihydro 10,11 dihydroxycarbamazepine.mp. | 0       | Advanced    |
| 21 | carbamazepine 10,11 oxide.mp.                   | 0       | Advanced    |
| 22 | SC 1001A.mp.                                    | 0       | Advanced    |
| 23 | abecarnil.mp.                                   | 0       | Advanced    |
| 24 | acetazolamide.mp.                               | 7       | Advanced    |
| 25 | albutoin.mp.                                    | 0       | Advanced    |
| 26 | allomethadione.mp.                              | 0       | Advanced    |
| 27 | ameltolide.mp.                                  | 0       | Advanced    |
| 28 | ascorbate magnesium.mp.                         | 0       | Advanced    |
| 29 | barbexaclone.mp.                                | 0       | Advanced    |
| 30 | beclamide.mp.                                   | 0       | Advanced    |



|    |                             |    |          |
|----|-----------------------------|----|----------|
| 31 | benzobarbital.mp.           | 0  | Advanced |
| 32 | brivaracetam.mp.            | 0  | Advanced |
| 33 | bromides.mp.                | 0  | Advanced |
| 34 | brosuximide.mp.             | 0  | Advanced |
| 35 | calcium bromide.mp.         | 0  | Advanced |
| 36 | carabersat.mp.              | 0  | Advanced |
| 37 | caramiphen.mp.              | 0  | Advanced |
| 38 | carbamazepine.mp.           | 81 | Advanced |
| 39 | cinromide.mp.               | 0  | Advanced |
| 40 | cyheptamide.mp.             | 0  | Advanced |
| 41 | chlormethiazole.mp.         | 2  | Advanced |
| 42 | clonazepam.mp.              | 20 | Advanced |
| 43 | clorazepate dipotassium.mp. | 0  | Advanced |
| 44 | denzimol.mp.                | 0  | Advanced |
| 45 | dextromethorphan.mp.        | 10 | Advanced |
| 46 | dezinamide.mp.              | 0  | Advanced |
| 47 | diazepam.mp.                | 62 | Advanced |
| 48 | doxenitoin.mp.              | 0  | Advanced |
| 49 | dimethadione.mp.            | 0  | Advanced |
| 50 | endixaprine.mp.             | 0  | Advanced |
| 51 | estazolam.mp.               | 3  | Advanced |
| 52 | etazepine.mp.               | 0  | Advanced |
| 53 | eterobarb.mp.               | 0  | Advanced |
| 54 | ethotoin.mp.                | 0  | Advanced |
| 55 | ethosuximide.mp.            | 3  | Advanced |
| 56 | etriacetam.mp.              | 0  | Advanced |
| 57 | fali lepsin.mp.             | 0  | Advanced |
| 58 | felbamate.mp.               | 1  | Advanced |
| 59 | fluoresone.mp.              | 0  | Advanced |
| 60 | flunarizine.mp.             | 5  | Advanced |
| 61 | fluzinamide.mp.             | 0  | Advanced |
| 62 | fosphenytoin sodium.mp.     | 0  | Advanced |

|    |                         |    |          |
|----|-------------------------|----|----------|
| 63 | gabapentin.mp.          | 42 | Advanced |
| 64 | ganaxolone.mp.          | 0  | Advanced |
| 65 | harkoseride.mp.         | 0  | Advanced |
| 66 | imidazenil.mp.          | 0  | Advanced |
| 67 | ladoxaprime.mp.         | 0  | Advanced |
| 68 | lamotrigine.mp.         | 38 | Advanced |
| 69 | lanicemine.mp.          | 0  | Advanced |
| 70 | licarbazepine.mp.       | 1  | Advanced |
| 71 | lorazepam.mp.           | 47 | Advanced |
| 72 | loreclezole.mp.         | 0  | Advanced |
| 73 | losigamone.mp.          | 1  | Advanced |
| 74 | magnesium sulfate.mp.   | 32 | Advanced |
| 75 | medazepam.mp.           | 1  | Advanced |
| 76 | mephenytoin.mp.         | 0  | Advanced |
| 77 | meph?barbital.mp.       | 1  | Advanced |
| 78 | metharbital.mp.         | 0  | Advanced |
| 79 | methylphenobarbital.mp. | 0  | Advanced |
| 80 | mesuximide.mp.          | 0  | Advanced |
| 81 | milacemide.mp.          | 0  | Advanced |
| 82 | nafimidone.mp.          | 0  | Advanced |
| 83 | nitrazepam.mp.          | 6  | Advanced |
| 84 | normephenytoin.mp.      | 0  | Advanced |
| 85 | normesuximide.mp.       | 0  | Advanced |
| 86 | oxcarbazepine.mp.       | 16 | Advanced |
| 87 | paramethadione.mp.      | 0  | Advanced |
| 88 | pazinaclone.mp.         | 0  | Advanced |
| 89 | pentoxyverine.mp.       | 0  | Advanced |
| 90 | phenacemide.mp.         | 0  | Advanced |
| 91 | pheneturide.mp.         | 0  | Advanced |
| 92 | phenobarbital.mp.       | 23 | Advanced |
| 93 | phensuximide.mp.        | 0  | Advanced |
| 94 | phenytoin.mp.           | 42 | Advanced |

|     |                                       |    |          |
|-----|---------------------------------------|----|----------|
| 95  | potassium bromide.mp.                 | 0  | Advanced |
| 96  | pregabalin.mp.                        | 26 | Advanced |
| 97  | primidone.mp.                         | 4  | Advanced |
| 98  | progabide.mp.                         | 0  | Advanced |
| 99  | ralitoline.mp.                        | 0  | Advanced |
| 100 | remacemide.mp.                        | 1  | Advanced |
| 101 | retigabine.mp.                        | 2  | Advanced |
| 102 | riluzole.mp.                          | 3  | Advanced |
| 103 | ropizine.mp.                          | 0  | Advanced |
| 104 | rufinamide.mp.                        | 2  | Advanced |
| 105 | safinamide.mp.                        | 0  | Advanced |
| 106 | seletracetam.mp.                      | 0  | Advanced |
| 107 | sodium bromide.mp.                    | 0  | Advanced |
| 108 | stiripentol.mp.                       | 0  | Advanced |
| 109 | sultiame.mp.                          | 0  | Advanced |
| 110 | shosaikoto go keishikashakuyakuto.mp. | 0  | Advanced |
| 111 | saiko keishi to.mp.                   | 1  | Advanced |
| 112 | talampanel.mp.                        | 0  | Advanced |
| 113 | taltrimide.mp.                        | 0  | Advanced |
| 114 | tiagabine.mp.                         | 8  | Advanced |
| 115 | topiramate.mp.                        | 30 | Advanced |
| 116 | thiopental.mp.                        | 12 | Advanced |
| 117 | tiletamine.mp.                        | 0  | Advanced |
| 118 | trimethadione.mp.                     | 0  | Advanced |
| 119 | valproic acid.mp.                     | 40 | Advanced |
| 120 | valproic acid derivative.mp.          | 0  | Advanced |
| 121 | valproate magnesium.mp.               | 0  | Advanced |
| 122 | valproate semisodium.mp.              | 2  | Advanced |
| 123 | valpromide.mp.                        | 0  | Advanced |
| 124 | valrocemide.mp.                       | 0  | Advanced |
| 125 | vigabatrin.mp.                        | 10 | Advanced |
| 126 | zalepion.mp.                          | 0  | Advanced |

|                                                          |      |          |
|----------------------------------------------------------|------|----------|
| 127 zonisamide.mp.                                       | 6    | Advanced |
| 128 (drug adj2 (therap* or treatment? or interven*)).mp. | 5472 | Advanced |
| 129 medication*.mp.                                      | 1460 | Advanced |
| 130 or/9-129                                             | 6322 | Advanced |
| 131 8 and 130                                            | 13   | Advanced |

## EBM Reviews - Database of Abstracts of Reviews of Effects 1st Quarter 2013

---

| #  | Searches                                    | Results | Search Type |
|----|---------------------------------------------|---------|-------------|
| 1  | (onset adj4 seizure?).mp.                   | 4       | Advanced    |
| 2  | (first adj4 seizure?).mp.                   | 3       | Advanced    |
| 3  | ((new or newly) adj4 seizure?).mp.          | 2       | Advanced    |
| 4  | (initial adj4 seizure?).mp.                 | 0       | Advanced    |
| 5  | (early adj4 seizure?).mp.                   | 3       | Advanced    |
| 6  | (primar* adj4 seizure?).mp.                 | 9       | Advanced    |
| 7  | (de novo adj4 seizure?).mp.                 | 0       | Advanced    |
| 8  | or/1-7                                      | 17      | Advanced    |
| 9  | prognos*.mp.                                | 887     | Advanced    |
| 10 | risk*.mp.                                   | 7763    | Advanced    |
| 11 | ((treatment? or therap*) adj2 outcome?).mp. | 5899    | Advanced    |
| 12 | (disease? adj2 survival?).mp.               | 320     | Advanced    |
| 13 | (medical* adj2 futilit*).mp.                | 0       | Advanced    |
| 14 | nomogram?.mp.                               | 9       | Advanced    |
| 15 | recurr*.mp.                                 | 1453    | Advanced    |
| 16 | or/9-15                                     | 11685   | Advanced    |
| 17 | 8 and 16                                    | 16      | Advanced    |
| 18 | limit 17 to last 5 years                    | 16      | Advanced    |

**Cochrane**

EBM Reviews - Cochrane Central Register of Controlled Trials February 2013

| #  | Searches                                        | Results | Search Type |
|----|-------------------------------------------------|---------|-------------|
| 1  | (onset adj4 seizure?).mp.                       | 243     | Advanced    |
| 2  | (first adj4 seizure?).mp.                       | 146     | Advanced    |
| 3  | ((new or newly) adj4 seizure?).mp.              | 72      | Advanced    |
| 4  | (initial adj4 seizure?).mp.                     | 42      | Advanced    |
| 5  | (early adj4 seizure?).mp.                       | 54      | Advanced    |
| 6  | (primar* adj4 seizure?).mp.                     | 92      | Advanced    |
| 7  | (de novo adj4 seizure?).mp.                     | 0       | Advanced    |
| 8  | or/1-7                                          | 524     | Advanced    |
| 9  | exp Patient Satisfaction/<br>Safety/            | 6878    | Advanced    |
| 10 |                                                 | 2599    | Advanced    |
| 11 | Patient Safety/                                 | 13      | Advanced    |
| 12 | Automobile Driving/<br>Accidents, Traffic/      | 504     | Advanced    |
| 13 |                                                 | 250     | Advanced    |
| 14 | (traffic adj2 safe*).mp.                        | 121     | Advanced    |
| 15 | driving*.mp.                                    | 1257    | Advanced    |
| 16 | Patient Education as Topic/<br>Education/       | 5015    | Advanced    |
| 17 |                                                 | 375     | Advanced    |
| 18 | (patient? adj2 educat*).mp.                     | 6210    | Advanced    |
| 19 | Counseling/<br>Directive Counseling/            | 2111    | Advanced    |
| 20 |                                                 | 163     | Advanced    |
| 21 | or/9-20                                         | 18574   | Advanced    |
| 22 | 8 and 21                                        | 7       | Advanced    |
| 23 | (seizure? adj10 driving*).mp.                   | 1       | Advanced    |
| 24 | 22 or 23                                        | 7       | Advanced    |
| 25 | limit 24 to yr="2009 -Current"                  | 2       | Advanced    |
| 26 | (2009* or 2010* or 2011* or 2012* or 2013*).up. | 680935  | Advanced    |
| 27 | 24 and 26                                       | 7       | Advanced    |
| 28 | 25 or 27                                        | 7       | Advanced    |

## EBM Reviews - Cochrane Central Register of Controlled Trials February 2013

| #  | Searches                                        | Results | Search Type |
|----|-------------------------------------------------|---------|-------------|
| 1  | (onset adj4 seizure?).mp.                       | 243     | Advanced    |
| 2  | (first adj4 seizure?).mp.                       | 146     | Advanced    |
| 3  | ((new or newly) adj4 seizure?).mp.              | 72      | Advanced    |
| 4  | (initial adj4 seizure?).mp.                     | 42      | Advanced    |
| 5  | (early adj4 seizure?).mp.                       | 54      | Advanced    |
| 6  | (primar* adj4 seizure?).mp.                     | 92      | Advanced    |
| 7  | (de novo adj4 seizure?).mp.                     | 0       | Advanced    |
| 8  | or/1-7                                          | 524     | Advanced    |
| 9  | exp Anticonvulsants/                            | 6927    | Advanced    |
| 10 | Drug Therapy/                                   | 296     | Advanced    |
| 11 | exp Drug Therapy, Combination/                  | 31361   | Advanced    |
| 12 | exp Medication Errors/                          | 131     | Advanced    |
| 13 | polypharmacy/                                   | 53      | Advanced    |
| 14 | pharmaceutical care/                            | 68      | Advanced    |
| 15 | antiepileptic*.mp.                              | 863     | Advanced    |
| 16 | anti-epileptic*.mp.                             | 80      | Advanced    |
| 17 | anticonvuls*.mp.                                | 2022    | Advanced    |
| 18 | anti-convuls*.mp.                               | 18      | Advanced    |
| 19 | antiepilepsirine*.mp.                           | 3       | Advanced    |
| 20 | 1 methyl 1,2 diphenylethylamine.mp.             | 1       | Advanced    |
| 21 | 2 isopropylvaleramide.mp.                       | 0       | Advanced    |
| 22 | 2 propyl 2 pentenoic acid.mp.                   | 0       | Advanced    |
| 23 | 2 propyl 4 pentenoic acid.mp.                   | 0       | Advanced    |
| 24 | 4 valproylaminobutyric acid.mp.                 | 0       | Advanced    |
| 25 | 5 benzylidenehydantoin.mp.                      | 0       | Advanced    |
| 26 | 10, 11 dihydro 10,11 dihydroxycarbamazepine.mp. | 0       | Advanced    |
| 27 | carbamazepine 10,11 oxide.mp.                   | 8       | Advanced    |

|    |                             |      |          |
|----|-----------------------------|------|----------|
| 28 | SC 1001A.mp.                | 0    | Advanced |
| 29 | abecarnil.mp.               | 13   | Advanced |
| 30 | acetazolamide.mp.           | 468  | Advanced |
| 31 | albutoin.mp.                | 3    | Advanced |
| 32 | allomethadione.mp.          | 0    | Advanced |
| 33 | ameltolide.mp.              | 0    | Advanced |
| 34 | ascorbate magnesium.mp.     | 0    | Advanced |
| 35 | barbexaclone.mp.            | 2    | Advanced |
| 36 | beclamide.mp.               | 4    | Advanced |
| 37 | benzobarbital.mp.           | 0    | Advanced |
| 38 | brivaracetam.mp.            | 19   | Advanced |
| 39 | bromides.mp.                | 33   | Advanced |
| 40 | brosuximide.mp.             | 0    | Advanced |
| 41 | calcium bromide.mp.         | 0    | Advanced |
| 42 | carabersat.mp.              | 0    | Advanced |
| 43 | caramiphen.mp.              | 1    | Advanced |
| 44 | carbamazepine.mp.           | 1277 | Advanced |
| 45 | cinromide.mp.               | 4    | Advanced |
| 46 | cyheptamide.mp.             | 0    | Advanced |
| 47 | chlormethiazole.mp.         | 82   | Advanced |
| 48 | clonazepam.mp.              | 246  | Advanced |
| 49 | clorazepate dipotassium.mp. | 125  | Advanced |
| 50 | denzimol.mp.                | 0    | Advanced |
| 51 | dextromethorphan.mp.        | 290  | Advanced |
| 52 | dezinamide.mp.              | 3    | Advanced |
| 53 | diazepam.mp.                | 3395 | Advanced |
| 54 | doxenitoin.mp.              | 0    | Advanced |
| 55 | dimethadione.mp.            | 2    | Advanced |
| 56 | endixaprine.mp.             | 0    | Advanced |
| 57 | estazolam.mp.               | 59   | Advanced |
| 58 | etazepine.mp.               | 0    | Advanced |
| 59 | eterobarb.mp.               | 3    | Advanced |



|    |                         |      |          |
|----|-------------------------|------|----------|
| 60 | ethotoin.mp.            | 2    | Advanced |
| 61 | ethosuximide.mp.        | 24   | Advanced |
| 62 | etriacetam.mp.          | 0    | Advanced |
| 63 | fali lepsin.mp.         | 0    | Advanced |
| 64 | felbamate.mp.           | 59   | Advanced |
| 65 | fluoresone.mp.          | 0    | Advanced |
| 66 | flunarizine.mp.         | 265  | Advanced |
| 67 | fluzinamide.mp.         | 0    | Advanced |
| 68 | fosphenytoin sodium.mp. | 5    | Advanced |
| 69 | gabapentin.mp.          | 555  | Advanced |
| 70 | ganaxolone.mp.          | 6    | Advanced |
| 71 | harkoseride.mp.         | 0    | Advanced |
| 72 | imidazenil.mp.          | 0    | Advanced |
| 73 | ladoxaprime.mp.         | 0    | Advanced |
| 74 | lamotrigine.mp.         | 560  | Advanced |
| 75 | lanicemine.mp.          | 0    | Advanced |
| 76 | licarbazepine.mp.       | 6    | Advanced |
| 77 | lorazepam.mp.           | 1243 | Advanced |
| 78 | loreclezole.mp.         | 4    | Advanced |
| 79 | losigamone.mp.          | 13   | Advanced |
| 80 | magnesium sulfate.mp.   | 774  | Advanced |
| 81 | medazepam.mp.           | 58   | Advanced |
| 82 | mephenytoin.mp.         | 62   | Advanced |
| 83 | meph?barbital.mp.       | 3    | Advanced |
| 84 | metharbital.mp.         | 1    | Advanced |
| 85 | methylphenobarbital.mp. | 4    | Advanced |
| 86 | mesuximide.mp.          | 1    | Advanced |
| 87 | milacemide.mp.          | 12   | Advanced |
| 88 | nafimidone.mp.          | 0    | Advanced |
| 89 | nitrazepam.mp.          | 324  | Advanced |
| 90 | normephenytoin.mp.      | 0    | Advanced |
| 91 | normesuximide.mp.       | 0    | Advanced |

|     |                                       |      |          |
|-----|---------------------------------------|------|----------|
| 92  | oxcarbazepine.mp.                     | 187  | Advanced |
| 93  | paramethadione.mp.                    | 0    | Advanced |
| 94  | pazinaclone.mp.                       | 5    | Advanced |
| 95  | pentoxyverine.mp.                     | 0    | Advanced |
| 96  | phenacemide.mp.                       | 0    | Advanced |
| 97  | pheneturide.mp.                       | 3    | Advanced |
| 98  | phenobarbital.mp.                     | 736  | Advanced |
| 99  | phensuximide.mp.                      | 0    | Advanced |
| 100 | phenytoin.mp.                         | 857  | Advanced |
| 101 | potassium bromide.mp.                 | 2    | Advanced |
| 102 | pregabalin.mp.                        | 238  | Advanced |
| 103 | primidone.mp.                         | 93   | Advanced |
| 104 | progabide.mp.                         | 28   | Advanced |
| 105 | ralitoline.mp.                        | 0    | Advanced |
| 106 | remacemide.mp.                        | 43   | Advanced |
| 107 | retigabine.mp.                        | 28   | Advanced |
| 108 | riluzole.mp.                          | 65   | Advanced |
| 109 | ropizine.mp.                          | 0    | Advanced |
| 110 | rufinamide.mp.                        | 33   | Advanced |
| 111 | safinamide.mp.                        | 2    | Advanced |
| 112 | seletracetam.mp.                      | 0    | Advanced |
| 113 | sodium bromide.mp.                    | 12   | Advanced |
| 114 | stiripentol.mp.                       | 14   | Advanced |
| 115 | sultiame.mp.                          | 5    | Advanced |
| 116 | shosaikoto go keishikashakuyakuto.mp. | 0    | Advanced |
| 117 | saiko keishi to.mp.                   | 1    | Advanced |
| 118 | talampanel.mp.                        | 5    | Advanced |
| 119 | taltrimide.mp.                        | 2    | Advanced |
| 120 | tiagabine.mp.                         | 126  | Advanced |
| 121 | topiramate.mp.                        | 465  | Advanced |
| 122 | thiopental.mp.                        | 1821 | Advanced |
| 123 | tiletamine.mp.                        | 0    | Advanced |

|     |                                                      |        |          |
|-----|------------------------------------------------------|--------|----------|
| 124 | trimethadione.mp.                                    | 10     | Advanced |
| 125 | valproic acid.mp.                                    | 776    | Advanced |
| 126 | valproic acid derivative.mp.                         | 0      | Advanced |
| 127 | valproate magnesium.mp.                              | 5      | Advanced |
| 128 | valproate semisodium.mp.                             | 31     | Advanced |
| 129 | valpromide.mp.                                       | 15     | Advanced |
| 130 | valroceamide.mp.                                     | 0      | Advanced |
| 131 | vigabatrin.mp.                                       | 242    | Advanced |
| 132 | zalepion.mp.                                         | 0      | Advanced |
| 133 | zonisamide.mp.                                       | 71     | Advanced |
| 134 | (drug adj2 (therap* or treatment? or interven*)).mp. | 60369  | Advanced |
| 135 | medication*.mp.                                      | 26647  | Advanced |
| 136 | (dt or tu or th).fs.                                 | 214674 | Advanced |
| 137 | or/9-136                                             | 264741 | Advanced |
| 138 | 8 and 137                                            | 435    | Advanced |
| 139 | limit 138 to yr="2009 -Current"                      | 76     | Advanced |
| 140 | (2009* or 2010* or 2011* or 2012* or 2013*).up.      | 680935 | Advanced |
| 141 | 138 and 140                                          | 435    | Advanced |
| 142 | 139 or 141                                           | 435    | Advanced |

---

 EBM Reviews - Cochrane Central Register of Controlled Trials February 2013

| #  | Searches                                        | Results | Search Type |
|----|-------------------------------------------------|---------|-------------|
| 1  | (onset adj4 seizure?).mp.                       | 243     | Advanced    |
| 2  | (first adj4 seizure?).mp.                       | 146     | Advanced    |
| 3  | ((new or newly) adj4 seizure?).mp.              | 72      | Advanced    |
| 4  | (initial adj4 seizure?).mp.                     | 42      | Advanced    |
| 5  | (early adj4 seizure?).mp.                       | 54      | Advanced    |
| 6  | (primar* adj4 seizure?).mp.                     | 92      | Advanced    |
| 7  | (de novo adj4 seizure?).mp.                     | 0       | Advanced    |
| 8  | or/1-7                                          | 524     | Advanced    |
| 9  | Prognosis/                                      | 8380    | Advanced    |
| 10 | exp treatment outcome/                          | 70176   | Advanced    |
| 11 | disease-free survival/                          | 3364    | Advanced    |
| 12 | Medical Futility/                               | 13      | Advanced    |
| 13 | nomograms/                                      | 19      | Advanced    |
| 14 | risk factors/                                   | 14207   | Advanced    |
| 15 | Risk Assessment/                                | 4809    | Advanced    |
| 16 | risk reduction behavior/                        | 608     | Advanced    |
| 17 | Recurrence/                                     | 10038   | Advanced    |
| 18 | prognos*.mp.                                    | 15026   | Advanced    |
| 19 | risk*.mp.                                       | 61330   | Advanced    |
| 20 | recurr*.mp.                                     | 24125   | Advanced    |
| 21 | or/9-20                                         | 141560  | Advanced    |
| 22 | 8 and 21                                        | 256     | Advanced    |
| 23 | limit 22 to yr="2009 -Current"                  | 47      | Advanced    |
| 24 | (2009* or 2010* or 2011* or 2012* or 2013*).up. | 680935  | Advanced    |
| 25 | 22 and 24                                       | 256     | Advanced    |

## EBM Reviews - Cochrane Database of Systematic Reviews 2005 to February 2013

| #  | Searches                                        | Results | Search Type |
|----|-------------------------------------------------|---------|-------------|
| 1  | (onset adj4 seizure?).mp.                       | 59      | Advanced    |
| 2  | (first adj4 seizure?).mp.                       | 56      | Advanced    |
| 3  | ((new or newly) adj4 seizure?).mp.              | 22      | Advanced    |
| 4  | (initial adj4 seizure?).mp.                     | 13      | Advanced    |
| 5  | (early adj4 seizure?).mp.                       | 19      | Advanced    |
| 6  | (primar* adj4 seizure?).mp.                     | 43      | Advanced    |
| 7  | (de novo adj4 seizure?).mp.                     | 1       | Advanced    |
| 8  | or/1-7                                          | 107     | Advanced    |
| 9  | antiepileptic*.mp.                              | 142     | Advanced    |
| 10 | anti-epileptic*.mp.                             | 32      | Advanced    |
| 11 | anticonvuls*.mp.                                | 284     | Advanced    |
| 12 | anti-convuls*.mp.                               | 30      | Advanced    |
| 13 | antiepilepsirine*.mp.                           | 0       | Advanced    |
| 14 | 1 methyl 1,2 diphenylethylamine.mp.             | 0       | Advanced    |
| 15 | 2 isopropylvaleramide.mp.                       | 0       | Advanced    |
| 16 | 2 propyl 2 pentenoic acid.mp.                   | 0       | Advanced    |
| 17 | 2 propyl 4 pentenoic acid.mp.                   | 0       | Advanced    |
| 18 | 4 valproylaminobutyric acid.mp.                 | 0       | Advanced    |
| 19 | 5 benzylidenehydantoin.mp.                      | 0       | Advanced    |
| 20 | 10, 11 dihydro 10,11 dihydroxycarbamazepine.mp. | 0       | Advanced    |
| 21 | carbamazepine 10,11 oxide.mp.                   | 0       | Advanced    |
| 22 | SC 1001A.mp.                                    | 0       | Advanced    |
| 23 | abecarnil.mp.                                   | 2       | Advanced    |
| 24 | acetazolamide.mp.                               | 34      | Advanced    |
| 25 | albutoin.mp.                                    | 0       | Advanced    |
| 26 | allomethadione.mp.                              | 0       | Advanced    |
| 27 | ameltolide.mp.                                  | 0       | Advanced    |
| 28 | ascorbate magnesium.mp.                         | 0       | Advanced    |
| 29 | barbexaclone.mp.                                | 1       | Advanced    |

|    |                             |     |          |
|----|-----------------------------|-----|----------|
| 30 | beclamide.mp.               | 1   | Advanced |
| 31 | benzobarbital.mp.           | 0   | Advanced |
| 32 | brivaracetam.mp.            | 1   | Advanced |
| 33 | bromides.mp.                | 0   | Advanced |
| 34 | brosuximide.mp.             | 0   | Advanced |
| 35 | calcium bromide.mp.         | 0   | Advanced |
| 36 | carabersat.mp.              | 0   | Advanced |
| 37 | caramiphen.mp.              | 0   | Advanced |
| 38 | carbamazepine.mp.           | 148 | Advanced |
| 39 | cinromide.mp.               | 2   | Advanced |
| 40 | cyheptamide.mp.             | 0   | Advanced |
| 41 | chlormethiazole.mp.         | 8   | Advanced |
| 42 | clonazepam.mp.              | 71  | Advanced |
| 43 | clorazepate dipotassium.mp. | 4   | Advanced |
| 44 | denzimol.mp.                | 0   | Advanced |
| 45 | dextromethorphan.mp.        | 20  | Advanced |
| 46 | dezinamide.mp.              | 0   | Advanced |
| 47 | diazepam.mp.                | 150 | Advanced |
| 48 | doxenitoin.mp.              | 0   | Advanced |
| 49 | dimethadione.mp.            | 0   | Advanced |
| 50 | endixaprine.mp.             | 1   | Advanced |
| 51 | estazolam.mp.               | 19  | Advanced |
| 52 | etazepine.mp.               | 0   | Advanced |
| 53 | eterobarb.mp.               | 0   | Advanced |
| 54 | ethotoin.mp.                | 3   | Advanced |
| 55 | ethosuximide.mp.            | 19  | Advanced |
| 56 | etriacetam.mp.              | 0   | Advanced |
| 57 | fali lepsin.mp.             | 0   | Advanced |
| 58 | felbamate.mp.               | 11  | Advanced |
| 59 | fluoresone.mp.              | 0   | Advanced |
| 60 | flunarizine.mp.             | 31  | Advanced |
| 61 | fluzinamide.mp.             | 0   | Advanced |

|    |                         |     |          |
|----|-------------------------|-----|----------|
| 62 | fosphenytoin sodium.mp. | 0   | Advanced |
| 63 | gabapentin.mp.          | 109 | Advanced |
| 64 | ganaxolone.mp.          | 1   | Advanced |
| 65 | harkoseride.mp.         | 0   | Advanced |
| 66 | imidazenil.mp.          | 1   | Advanced |
| 67 | ladoxaprine.mp.         | 0   | Advanced |
| 68 | lamotrigine.mp.         | 71  | Advanced |
| 69 | lanicemine.mp.          | 0   | Advanced |
| 70 | licarbazepine.mp.       | 1   | Advanced |
| 71 | lorazepam.mp.           | 89  | Advanced |
| 72 | loreclezole.mp.         | 0   | Advanced |
| 73 | losigamone.mp.          | 1   | Advanced |
| 74 | magnesium sulfate.mp.   | 46  | Advanced |
| 75 | medazepam.mp.           | 22  | Advanced |
| 76 | mephenytoin.mp.         | 4   | Advanced |
| 77 | meph?barbital.mp.       | 7   | Advanced |
| 78 | metharbital.mp.         | 1   | Advanced |
| 79 | methylphenobarbital.mp. | 1   | Advanced |
| 80 | mesuximide.mp.          | 1   | Advanced |
| 81 | milacemide.mp.          | 0   | Advanced |
| 82 | nafimidone.mp.          | 0   | Advanced |
| 83 | nitrazepam.mp.          | 30  | Advanced |
| 84 | normephenytoin.mp.      | 0   | Advanced |
| 85 | normesuximide.mp.       | 0   | Advanced |
| 86 | oxcarbazepine.mp.       | 45  | Advanced |
| 87 | paramethadione.mp.      | 2   | Advanced |
| 88 | pazinaclone.mp.         | 1   | Advanced |
| 89 | pentoxyverine.mp.       | 0   | Advanced |
| 90 | phenacemide.mp.         | 2   | Advanced |
| 91 | pheneturide.mp.         | 1   | Advanced |
| 92 | phenobarbital.mp.       | 68  | Advanced |
| 93 | phensuximide.mp.        | 1   | Advanced |

|     |                                       |     |          |
|-----|---------------------------------------|-----|----------|
| 94  | phenytoin.mp.                         | 110 | Advanced |
| 95  | potassium bromide.mp.                 | 0   | Advanced |
| 96  | pregabalin.mp.                        | 56  | Advanced |
| 97  | primidone.mp.                         | 24  | Advanced |
| 98  | progabide.mp.                         | 6   | Advanced |
| 99  | ralitoline.mp.                        | 0   | Advanced |
| 100 | remacemide.mp.                        | 4   | Advanced |
| 101 | retigabine.mp.                        | 4   | Advanced |
| 102 | riluzole.mp.                          | 27  | Advanced |
| 103 | ropizine.mp.                          | 0   | Advanced |
| 104 | rufinamide.mp.                        | 7   | Advanced |
| 105 | safinamide.mp.                        | 1   | Advanced |
| 106 | seletracetam.mp.                      | 1   | Advanced |
| 107 | sodium bromide.mp.                    | 0   | Advanced |
| 108 | stiripentol.mp.                       | 3   | Advanced |
| 109 | sultiame.mp.                          | 2   | Advanced |
| 110 | shosaikoto go keishikashakuyakuto.mp. | 0   | Advanced |
| 111 | saiko keishi to.mp.                   | 0   | Advanced |
| 112 | talampanel.mp.                        | 1   | Advanced |
| 113 | taltrimide.mp.                        | 0   | Advanced |
| 114 | tiagabine.mp.                         | 32  | Advanced |
| 115 | topiramate.mp.                        | 67  | Advanced |
| 116 | thiopental.mp.                        | 21  | Advanced |
| 117 | tiletamine.mp.                        | 1   | Advanced |
| 118 | trimethadione.mp.                     | 2   | Advanced |
| 119 | valproic acid.mp.                     | 55  | Advanced |
| 120 | valproic acid derivative.mp.          | 1   | Advanced |
| 121 | valproate magnesium.mp.               | 0   | Advanced |
| 122 | valproate semisodium.mp.              | 4   | Advanced |
| 123 | valpromide.mp.                        | 2   | Advanced |
| 124 | valrocemide.mp.                       | 0   | Advanced |
| 125 | vigabatrin.mp.                        | 32  | Advanced |



|     |                                                      |      |          |
|-----|------------------------------------------------------|------|----------|
| 126 | zalepion.mp.                                         | 0    | Advanced |
| 127 | zonisamide.mp.                                       | 30   | Advanced |
| 128 | (drug adj2 (therap* or treatment? or interven*)).mp. | 3492 | Advanced |
| 129 | medication*.mp.                                      | 3137 | Advanced |
| 130 | or/9-129                                             | 4775 | Advanced |
| 131 | 8 and 130                                            | 102  | Advanced |
| 132 | limit 131 to yr="2009 -Current"                      | 73   | Advanced |
| 133 | (2009* or 2010* or 2011* or 2012* or 2013*).up.      | 8007 | Advanced |
| 134 | 131 and 133                                          | 102  | Advanced |
| 135 | 131 or 134                                           | 102  | Advanced |
| 136 | limit 135 to protocols                               | 22   | Advanced |
| 137 | 135 not 136                                          | 80   | Advanced |

---

## EBM Reviews - Cochrane Database of Systematic Reviews 2005 to January 2013

| #  | Searches                                        | Results | Search Type |
|----|-------------------------------------------------|---------|-------------|
| 1  | (onset adj4 seizure?).mp.                       | 59      | Advanced    |
| 2  | (first adj4 seizure?).mp.                       | 56      | Advanced    |
| 3  | ((new or newly) adj4 seizure?).mp.              | 22      | Advanced    |
| 4  | (initial adj4 seizure?).mp.                     | 13      | Advanced    |
| 5  | (early adj4 seizure?).mp.                       | 19      | Advanced    |
| 6  | (primar* adj4 seizure?).mp.                     | 43      | Advanced    |
| 7  | (de novo adj4 seizure?).mp.                     | 1       | Advanced    |
| 8  | or/1-7                                          | 107     | Advanced    |
| 9  | prognos*.mp.                                    | 1316    | Advanced    |
| 10 | risk*.mp.                                       | 7366    | Advanced    |
| 11 | ((treatment? or therap*) adj2 outcome?).mp.     | 2899    | Advanced    |
| 12 | (disease? adj2 survival?).mp.                   | 282     | Advanced    |
| 13 | (medical* adj2 futilit*).mp.                    | 1       | Advanced    |
| 14 | nomogram?.mp.                                   | 12      | Advanced    |
| 15 | recurr*.mp.                                     | 1932    | Advanced    |
| 16 | or/9-15                                         | 7416    | Advanced    |
| 17 | 8 and 16                                        | 106     | Advanced    |
| 18 | limit 17 to yr="2009 -Current"                  | 75      | Advanced    |
| 19 | (2009* or 2010* or 2011* or 2012* or 2013*).up. | 7928    | Advanced    |
| 20 | 17 and 19                                       | 106     | Advanced    |
| 21 | 18 or 20                                        | 106     | Advanced    |
| 22 | limit 21 to protocols                           | 23      | Advanced    |
| 23 | 21 not 22                                       | 83      | Advanced    |

## EBM Reviews - Cochrane Database of Systematic Reviews 2005 to January 2013

| #  | Searches                                             | Results | Search Type |
|----|------------------------------------------------------|---------|-------------|
| 1  | (onset adj4 seizure?).mp.                            | 59      | Advanced    |
| 2  | (first adj4 seizure?).mp.                            | 56      | Advanced    |
| 3  | ((new or newly) adj4 seizure?).mp.                   | 22      | Advanced    |
| 4  | (initial adj4 seizure?).mp.                          | 13      | Advanced    |
| 5  | (early adj4 seizure?).mp.                            | 19      | Advanced    |
| 6  | (primar* adj4 seizure?).mp.                          | 43      | Advanced    |
| 7  | (de novo adj4 seizure?).mp.                          | 1       | Advanced    |
| 8  | or/1-7                                               | 107     | Advanced    |
| 9  | (patient? adj2 satisfact*).mp.                       | 798     | Advanced    |
| 10 | (patient? adj2 prefer*).mp.                          | 531     | Advanced    |
| 11 | safet*.mp.                                           | 3232    | Advanced    |
| 12 | (patient? adj2 safet*).mp.                           | 287     | Advanced    |
| 13 | ((automobile? or car?) adj2 (drive* or driving)).mp. | 36      | Advanced    |
| 14 | accident*.mp.                                        | 651     | Advanced    |
| 15 | (traffic adj2 safe*).mp.                             | 21      | Advanced    |
| 16 | driving*.mp.                                         | 141     | Advanced    |
| 17 | educat*.mp.                                          | 1822    | Advanced    |
| 18 | (patient? adj2 educat*).mp.                          | 378     | Advanced    |
| 19 | counsel*.mp.                                         | 818     | Advanced    |
| 20 | or/9-19                                              | 5119    | Advanced    |
| 21 | 8 and 20                                             | 65      | Advanced    |
| 22 | (seizure? adj10 driving*).mp.                        | 3       | Advanced    |
| 23 | 21 or 22                                             | 65      | Advanced    |
| 24 | limit 23 to yr="2009 -Current"                       | 48      | Advanced    |
| 25 | (2009* or 2010* or 2011* or 2012* or 2013*).up.      | 7928    | Advanced    |
| 26 | 23 and 25                                            | 65      | Advanced    |
| 27 | 24 or 26                                             | 65      | Advanced    |
| 28 | limit 26 to protocols                                | 11      | Advanced    |
| 29 | 27 not 28                                            | 54      | Advanced    |
