# Supplementary material
Source: PubMed Central journal article supplement (PMC4409581)
Supplement: supp_WNL.0000000000001487_Tables_e-1-5.pdf [file supp_WNL.0000000000001487_Tables_e-1-5.pdf]

**Table e-1: Prognosis: Risk of seizure recurrence after an unprovoked first seizure in adults (Class I and II studies)**

| Reference                                                           | Class | Design                                                                                                                    | Data collection                                                        | Concealed allocation                                                       | Completion rate                        | Spectrum bias | Outcome assessment                                                                        | Comments                                                                                                     |
|---------------------------------------------------------------------|-------|---------------------------------------------------------------------------------------------------------------------------|------------------------------------------------------------------------|----------------------------------------------------------------------------|----------------------------------------|---------------|-------------------------------------------------------------------------------------------|--------------------------------------------------------------------------------------------------------------|
| Hauser, 1982, <sup>10</sup><br>1990 <sup>11</sup>                   | I     | Prospective; representative cohort including both patients treated with AEDs and patients untreated with AEDs             | 238 patients; over 75% adults; patients with unprovoked first seizures | Yes; but choice of which AED to treat with was left to treating physicians | Over 85%                               | No            | Outcome was seizure recurrence over up to 12 years. Objectively assessed at up to 3 years | Cohort included both treated and untreated patients depending on preference of referring or study physicians |
| First Seizure Trial Group 1993, <sup>12</sup><br>1997 <sup>13</sup> | I     | Prospective; representative cohort including equal numbers of patients treated with AEDs and patients untreated with AEDs | 397 patients; over 70% adults; patients with unprovoked first seizures | Yes; but choice of which AED to treat with was left to treating physicians | Over 85%                               | No            | Outcome was seizure recurrence over up to 12 years. Objectively assessed                  | Randomized, controlled trial of immediate AED treatment over the short term and long term                    |
| Das, 2000 <sup>18</sup>                                             | II    | Prospective; representative cohort including both patients treated with AEDs and patients untreated with AEDs             | Predominantly adult unprovoked first seizure patients                  | Yes                                                                        | Over 80% completed 1 year of the study | No            | Outcome was seizure recurrence at 12 and 24 mos. Objectively assessed                     | Cohort included many children (ages not clearly noted). Completion rate at 24 mos not provided               |
| Bora, 1995 <sup>17</sup>                                            | II    | Prospective;                                                                                                              | 147 adult GTC                                                          | No; some                                                                   | All followed at                        | No            | Outcome was seizure                                                                       | Cohort included both                                                                                         |

|                              |    |                                                                                                                 |                                                                     |                                                                            |                                            |    |                                                                                          |                                                                                                                                                                   |
|------------------------------|----|-----------------------------------------------------------------------------------------------------------------|---------------------------------------------------------------------|----------------------------------------------------------------------------|--------------------------------------------|----|------------------------------------------------------------------------------------------|-------------------------------------------------------------------------------------------------------------------------------------------------------------------|
|                              |    | representative cohort including both patients treated with AEDs and patients untreated with AEDs                | unprovoked first seizure patients                                   | patients treated with AEDs prior to entering study                         | least 6 months                             |    | recurrence at up to 4 years. Not clear how objectively well assessed                     | treated and untreated patients depending on preference of referring or study physicians. Completion rate high but not well described                              |
| Hopkins, 1988 <sup>16</sup>  | II | Prospective; representative cohort including both patients treated with AEDs and patients untreated with AEDs   | 306 over 80% adults; some patients with apparent provoked seizures  | Yes; but choice of which AED to treat with was left to treating physicians | Not clearly specified but appears over 80% | No | Outcome was seizure recurrence at up to 3 years. Not clear how objectively well assessed | Cohort included both patients with provoked seizures and patients with unprovoked seizures. Treatment with AEDs was the choice of the referring physicians        |
| Annegers, 1986 <sup>19</sup> | II | Retrospective; representative cohort including both patients treated with AEDs and patients untreated with AEDs | 424 patient with over 60% adults; unprovoked first seizure patients | No, retrospective study                                                    | Over 90% follow-up at 2 years              | No | Outcome was objective                                                                    | Retrospective representative cohort study following patient up to 10 years                                                                                        |
| Kho, 2006 <sup>20</sup>      | II | Prospective; representative cohort including both patients treated with AEDs and patients untreated with AEDs   | 497 adult patients with both provoked and unprovoked first seizures | Yes; but choice of which AED to treat with was left to treating physicians | All followed for at least 1 year           | No | Outcome was objective                                                                    | Both patients with provoked seizures and patients with unprovoked seizures. Study focused mainly on comparison of multiple versus single seizures at presentation |

|                             |    |                                                                         |                                                                                  |                                                                                                                           |                                  |    |                                                                                    |                                                                                                                                                                   |
|-----------------------------|----|-------------------------------------------------------------------------|----------------------------------------------------------------------------------|---------------------------------------------------------------------------------------------------------------------------|----------------------------------|----|------------------------------------------------------------------------------------|-------------------------------------------------------------------------------------------------------------------------------------------------------------------|
| Marson, 2005 <sup>15</sup>  | II | Prospective; somewhat representative cohort                             | Includes over 40% with more than 1 seizure on entry, and over 60% adults         | Yes; randomized to immediate or deferred treatment; but choice of which AED to treat with was left to treating physicians | Over 90% follow-up at 1 year     | No | Outcome was seizure recurrence based on questionnaire                              | Cohort includes over 40% with more than one seizure on entry and children. Outcomes based on patient questionnaire                                                |
| Chandra, 1992 <sup>21</sup> | II | Prospective; somewhat representative cohort from an individual practice | Adult patients with unprovoked first seizure referred to a practice in Indonesia | Yes                                                                                                                       | Follow-up in over 96% at 1 year  | No | Outcome was seizure recurrence. Not clear how objectively well assessed            | Patients with unprovoked first seizure referred to a practice in Indonesia                                                                                        |
| Gilad, 1996 <sup>22</sup>   | II | Prospective; representative cohort from a hospital practice             | Adult patients with mainly unprovoked and possibly some provoked first seizures  | Yes                                                                                                                       | Follow-up in over 90% at 3 years | No | Outcome was seizure recurrence at 3 years. Not clear how objectively well assessed | Adult patients with mainly unprovoked and possibly some provoked first seizures referred to a hospital practice then randomized to immediate AED treatment or not |

AED = antiepileptic drug; GTC = generalized tonic-clonic; RCT = randomized, controlled trial.

**Table e-2: Therapeutics: Rates for short-term (1 and 2 years) seizure recurrence after an unprovoked first seizure in adults by immediate AED treatment (Class I and II studies)**

| Reference                                                        | Class | Design                                                                                                                                                     | Data collection                                                                             | Concealed allocation                                                       | Completion rate                        | Intent-to-treat analysis | Outcome assessment                                                      | Comments                                                                                                         |
|------------------------------------------------------------------|-------|------------------------------------------------------------------------------------------------------------------------------------------------------------|---------------------------------------------------------------------------------------------|----------------------------------------------------------------------------|----------------------------------------|--------------------------|-------------------------------------------------------------------------|------------------------------------------------------------------------------------------------------------------|
| First Seizure Trial Group 1993, <sup>12</sup> 1997 <sup>13</sup> | I     | Prospective; randomized representative cohort including equal numbers of AED treated and untreated patients                                                | 397 patients; over 70% adults; patients with unprovoked first seizures                      | Yes; but choice of which AED to treat with was left to treating physicians | Over 85%                               | Yes                      | Outcome was seizure recurrence and objective                            | RCT of immediate AED treatment over the short term and long term                                                 |
| Das, 2000 <sup>18</sup>                                          | II    | Prospective; RCT, representative cohort, immediate AED treatment or no treatment                                                                           | Predominantly adult patients with unprovoked first seizures seen at a single medical center | Yes                                                                        | Over 80% completed 1 year of the study | Yes                      | Outcome was seizure recurrence. Not clear how objectively well assessed | Cohort included many children (ages not clearly noted). Completion rate at 24 mos. not provided                  |
| Marson, 2005 <sup>15</sup>                                       | II    | Prospective; RCT of immediate vs delayed AED treatment; somewhat representative cohort, including patients with not just 1 seizure but prior also seizures | Includes over 40% with more than 1 seizure on entry, and over 60% adults                    | Yes; but choice of which AED to treat with was left to treating physicians | Over 90% follow-up at 1 year           | Yes                      | Outcome was seizure recurrence based on patient questionnaire           | Cohort includes over 40% with more than 1 seizure on entry and children. Outcomes based on patient questionnaire |

|                             |    |                                                                                                            |                                                                                                                             |     |                                  |                    |                                                                                    |                                                                                                                                                                                             |
|-----------------------------|----|------------------------------------------------------------------------------------------------------------|-----------------------------------------------------------------------------------------------------------------------------|-----|----------------------------------|--------------------|------------------------------------------------------------------------------------|---------------------------------------------------------------------------------------------------------------------------------------------------------------------------------------------|
| Chandra, 1992 <sup>21</sup> | II | Prospective; RCT; somewhat representative cohort from an individual practice                               | Adult patients with unprovoked first seizure referred to a practice in Indonesia randomized to receive valproate or placebo | Yes | Follow-up in over 96% at 1 year  | Not clearly stated | Outcome was seizure recurrence. Not clear how objectively well assessed            | Patients with unprovoked first seizures referred to a practice and randomized to receive valproate or placebo                                                                               |
| Gilad, 1996 <sup>22</sup>   | II | Prospective; representative cohort from a hospital practice; randomized to receive carbamazepine or no AED | Adult patients with mainly unprovoked and possibly some provoked first seizures                                             | Yes | Follow-up in over 90% at 3 years | No                 | Outcome was seizure recurrence at 3 years. Not clear how objectively well assessed | Adult patients with mainly unprovoked and possibly some provoked first seizures referred to a hospital practice and then randomized to immediate AED treatment with carbamazepine or no AED |

AED = antiepileptic drug; RCT = randomized, controlled trial.

**Table e-3: Therapeutic: Rates of 2-year seizure remission over the longer term (> 3 years), comparing immediate to deferred AED treatment of an unprovoked first seizure in adults (Class I and II studies)**

| Reference                                                        | Class | Design                                                                                                                                                     | Data collection                                                          | Concealed allocation                                                       | Completion rate              | Intent-to-treat analysis | Outcome assessment                                                                        | Comments                                                                                                         |
|------------------------------------------------------------------|-------|------------------------------------------------------------------------------------------------------------------------------------------------------------|--------------------------------------------------------------------------|----------------------------------------------------------------------------|------------------------------|--------------------------|-------------------------------------------------------------------------------------------|------------------------------------------------------------------------------------------------------------------|
| First Seizure Trial Group 1993, <sup>12</sup> 1997 <sup>13</sup> | I     | Prospective; randomized representative cohort including equal numbers of AED treated and untreated patients                                                | 397 patients; over 70% adults; patients with unprovoked first seizures   | Yes; but choice of which AED to treat with was left to treating physicians | Over 85%                     | Yes                      | Outcome was based on achieving a 2-year seizure remission rate and objective              | RCT of immediate AED as compared with delayed treatment over the short term and long term                        |
| Marson, 2005 <sup>15</sup>                                       | II    | Prospective; RCT of immediate vs delayed AED treatment; somewhat representative cohort, including patients with not just 1 seizure but also prior seizures | Includes over 40% with more than 1 seizure on entry, and over 60% adults | Yes; but choice of which AED to treat with was left to treating physicians | Over 90% follow-up at 1 year | Yes                      | Major outcome was achieving a 2-year seizure remission and based on patient questionnaire | Cohort includes over 40% with more than 1 seizure on entry and children. Outcomes based on patient questionnaire |

AED = antiepileptic drug; RCT = randomized, controlled trial.

**Table e-4: Therapeutics: Risk of adverse events or side effects in adults with an unprovoked first seizure treated with AEDs**

| Reference                                    | Class | Design                                                                                                                                                     | Data collection                                                                                                                                               | Concealed allocation                                                       | Completion rate                                                             | Intent-to-treat analysis | Outcome assessment                                                    | Comments                                                                                                                                                                                     |
|----------------------------------------------|-------|------------------------------------------------------------------------------------------------------------------------------------------------------------|---------------------------------------------------------------------------------------------------------------------------------------------------------------|----------------------------------------------------------------------------|-----------------------------------------------------------------------------|--------------------------|-----------------------------------------------------------------------|----------------------------------------------------------------------------------------------------------------------------------------------------------------------------------------------|
| First Seizure Trial Group 1993 <sup>12</sup> | II    | Prospective; randomized representative cohort including equal numbers of AED treated and untreated patients                                                | 397 patients; over 70% adults; patients with unprovoked first seizure; 20% discontinued AEDs at some point; side effects in untreated patients not considered | Yes; but choice of which AED to treat with was left to treating physicians | Over 85%; but 20% discontinued AEDs at some point, some due to side effects | Yes                      | Outcome was side effects from AEDs; AEDs included CBZ, PHT, PB, or SV | RCT of immediate AED treatment over the short and long term. 20% discontinued AEDs at some point either for side effects or other reasons; side effects in untreated patients not considered |
| Marson, 2005 <sup>15</sup>                   | II    | Prospective; RCT of immediate vs delayed AED treatment; somewhat representative cohort, including patients with not just 1 seizure but also prior seizures | Includes over 40% with more than one seizure on entry, and over 60% adults; side effects in untreated patients not considered                                 | Yes; but choice of which AED to treat with was left to treating physicians | Over 90% follow-up at 1 year                                                | Yes                      | Outcome side effects from AEDs; AEDS included CBZ, SV, PHT, or LMT    | Cohort includes over 40% with more than 1 seizure on entry and children. Outcomes based on patient questionnaire; side effects in untreated patients not considered                          |

|                             |     |                                                                                                  |                                                                                                                                      |                                                                            |                                  |                    |                                                                                      |                                                                                                                                                                                                                                      |
|-----------------------------|-----|--------------------------------------------------------------------------------------------------|--------------------------------------------------------------------------------------------------------------------------------------|----------------------------------------------------------------------------|----------------------------------|--------------------|--------------------------------------------------------------------------------------|--------------------------------------------------------------------------------------------------------------------------------------------------------------------------------------------------------------------------------------|
| Chandra, 1992 <sup>21</sup> | II  | Prospective; RCT; somewhat representative cohort from an individual practice                     | Adult patients with unprovoked first seizures referred to a practice in Indonesia randomized to receive valproate or placebo         | Yes                                                                        | Follow-up in over 96% at 1 year  | Not clearly stated | Outcome side effects from AED, VPA                                                   | Patients with first unprovoked seizures from a neurology practice; randomized to valproate or placebo                                                                                                                                |
| Gilad, 1996 <sup>22</sup>   | II  | Prospective; representative cohort from a hospital practice; randomized to receive CBZ or no AED | Adult patients with mainly unprovoked and possibly some provoked first seizures; side effects in untreated patients not considered   | Yes                                                                        | Follow-up in over 90% at 3 years | No                 | Outcome side effects from AED, CBZ; not clear how objectively well assessed          | Adult patients with mainly unprovoked and possibly some provoked first seizures referred to a hospital practice and then randomized to immediate AED treatment with CBZ or no AED; side effects in untreated patients not considered |
| Ruggles, 2001 <sup>27</sup> | III | Prospective; not representative cohort of elderly patients from a regional group practice        | Adult elderly patients, over age 50 years; patients with unprovoked first seizure; side effects in untreated patients not considered | Yes; but choice of which AED to treat with was left to treating physicians | Follow-up in over 85% at 3 years | Not clearly stated | Outcome side effects from AED, PHT, CBZ, SV; not clear how objectively well assessed | Prospective; not representative cohort of elderly patients from a regional group practice; outcome side effects from AED, PHT, CBZ, SV; not clear how objectively well assessed                                                      |

AED = antiepileptic drug; CBZ = carbamazepine; LMT = lamotrigine; PB = phenobarbital; PHT = phenytoin; RCT = randomized, controlled trial; SV = sodium valproate; VPA = valproic acid.

**Table e-5. Risk of AEs in adults with an unprovoked first seizure treated with antiepileptic drugs**

| <b>Reference</b> | <b>Class</b> | <b>No.</b> | <b>No.<br/>treated(%)</b> | <b>AED(s)</b>            | <b>AEs treated,<br/>n(%)</b> | <b>AEs untreated, n(%)</b> |
|------------------|--------------|------------|---------------------------|--------------------------|------------------------------|----------------------------|
| 12               | II           | 397        | 204(51)                   | CBZ,PHT,PB, or VPA       | 14(7)                        | Not reported               |
| 15               | II           | 1,443      | 722(50)                   | CBZ, VPA, PHT, or LMT    | 200(31)                      | Not reported               |
| 21               | II           | 228        | 113(50)                   | VPA                      | 10(9)                        | 2(2)                       |
| 22               | II           | 87         | 45(52)                    | CBZ                      | 9(20)                        | Not reported               |
| 28               | III          | 48         | 42(88)                    | PHT, CBZ, VPA            | 13(27)                       | Not reported               |
| <b>Total</b>     |              | 2,203      | 1,126(51)                 | CBZ, VPA, PHT,PB, or LMT | 246(22)                      | Not adequately reported    |

AEs = adverse events; AED(s) = antiepileptic drug(s); CBZ = carbamazepine; LMT = lamotrigine; PB = phenobarbital; PHT = phenytoin; VPA = valproic acid.
